# Supplementary material
Source: MDPI journal article supplement (https://www.mdpi.com/2077-0472/12/1/35)

# ENSEM – AWS Agro –Weather Station

## Quick Information

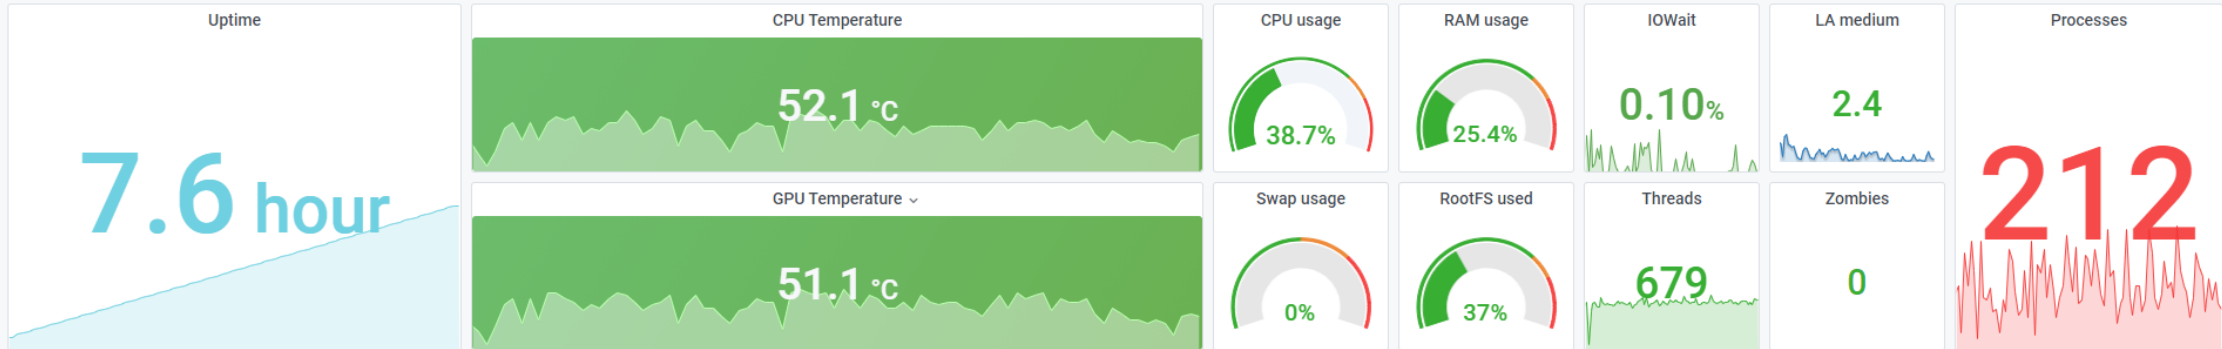

## Health Check

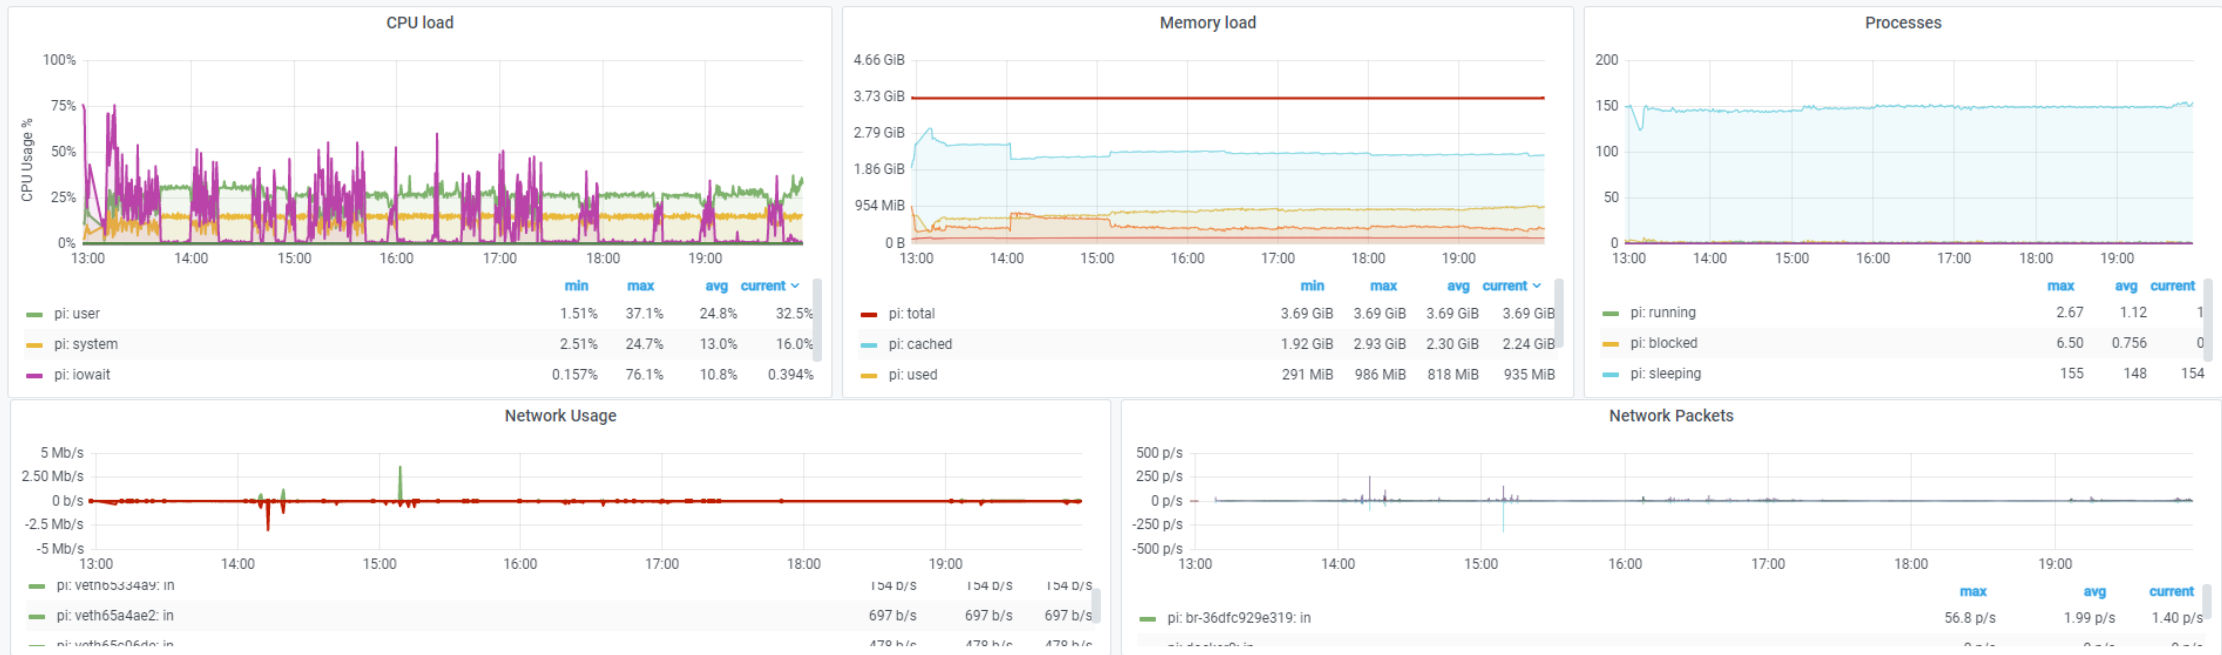

## Network performance

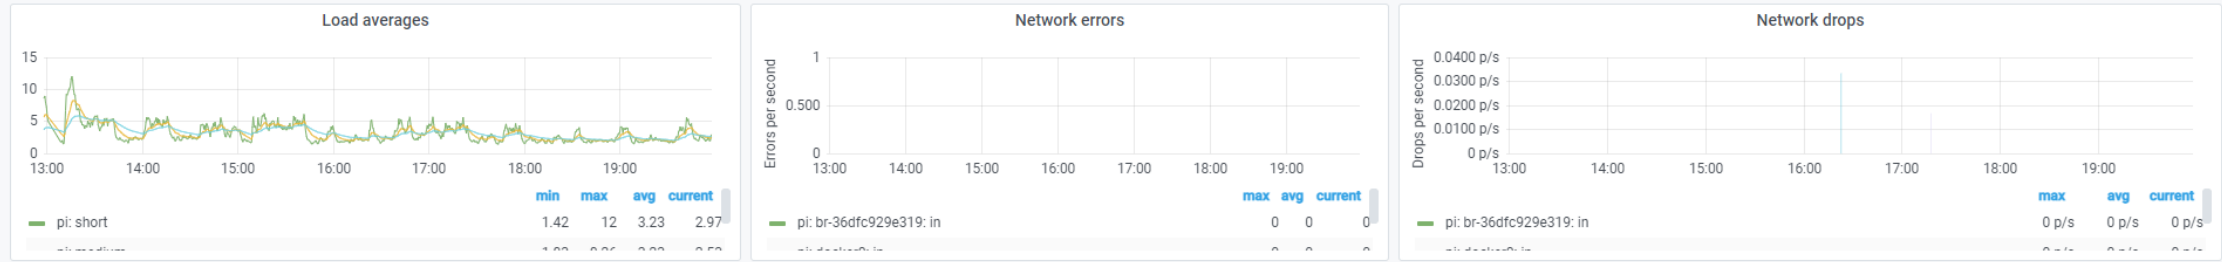

## Swap (2 panels)

## Disk IOPS for /dev/All

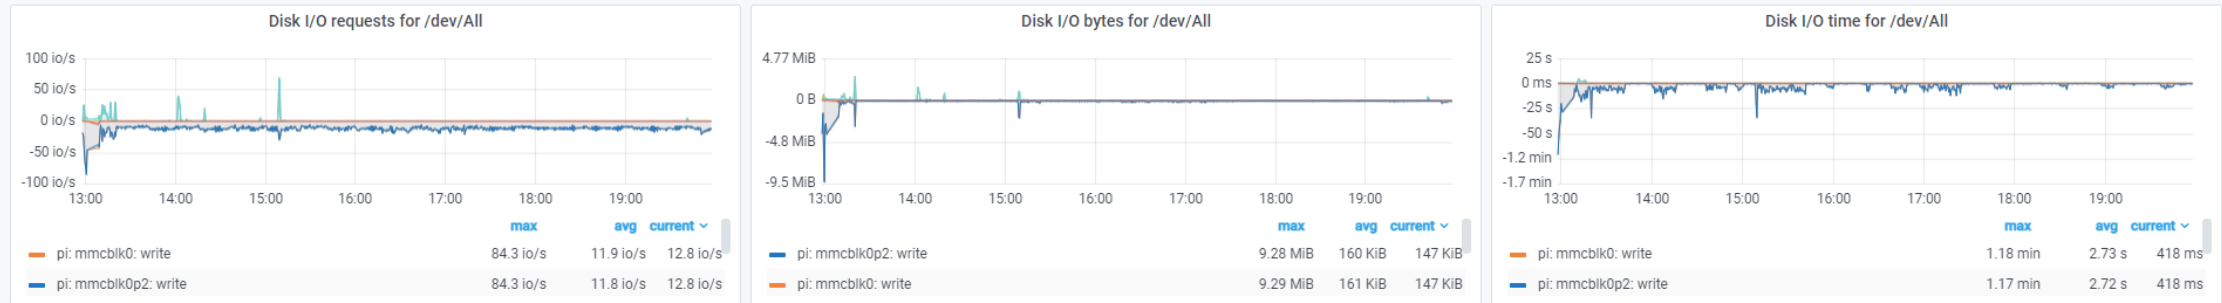

Supplement: s1 [file s1]
