# Supplementary material
Source: MDPI journal article supplement (https://www.mdpi.com/2077-0472/12/1/35)
Supplement: s1 [file s1]

# Supplementary Materials: An Agile AI and IoT-Augmented Smart Farming: A Cost-Effective Cognitive Weather Station

## Supplementary Part I

**Table S1.** Some of the most common challenges in IoT.

| Dilemma     | Description                                                                                                                                             | Impact                                                                                                     | Some Solutions                                                                                                                                                          |
|-------------|---------------------------------------------------------------------------------------------------------------------------------------------------------|------------------------------------------------------------------------------------------------------------|-------------------------------------------------------------------------------------------------------------------------------------------------------------------------|
| Energy      | A situation where the system's performance and functionality are impacted due to energetic challenges (high power consumption or low energy efficiency) | short lifetime. Low performance. High insta- bility                                                        | WSN Clustering.<br>Software and Hardware optimization.<br>Low-power wireless protocols.                                                                                 |
| Security    | An issue or a risk that is based on threats or vulnerabilities.                                                                                         | Data breach.<br>System and services un-availability.                                                       | Data encryption. Decentralized systems.<br>Usage of White/Black list authentication.<br>Usage of VPNs.                                                                  |
| Cost        | High cost related to hardware, software, and li- censes                                                                                                 | Limited use of solutions.                                                                                  | Usage of open-source technology.<br>Usage of low-cost hardware.<br>Migrate hardware based solution to software based services.                                          |
| Scalability | The ability to have a system that are customized for different use cases and able to be upgraded for future requirements.                               | High costs. Slow time to market, where solutions need to be developed from scratch.                        | Usage of cloud-based solution.<br>Adoption of remote accessibility and dynamic devices management approach.<br>Flexible software architecture such as containerization. |
| Standards   | Is the action to unify the diverse architectures to ensure interoperability.                                                                            | Technical complexity.<br>Integration challenges.<br>Security and privacy.<br>High cost for implementation. | Usage of standardized protocols such as HTTP, MQTT.                                                                                                                     |
| reliability | The ability that a system has to perform functions according to the specifications                                                                      | Low performance                                                                                            | Implementation of OAM for monitoring and control.<br>Components and services redundancy.<br>Deployment of fault tolerance strategy.                                     |

## Supplementary Part II

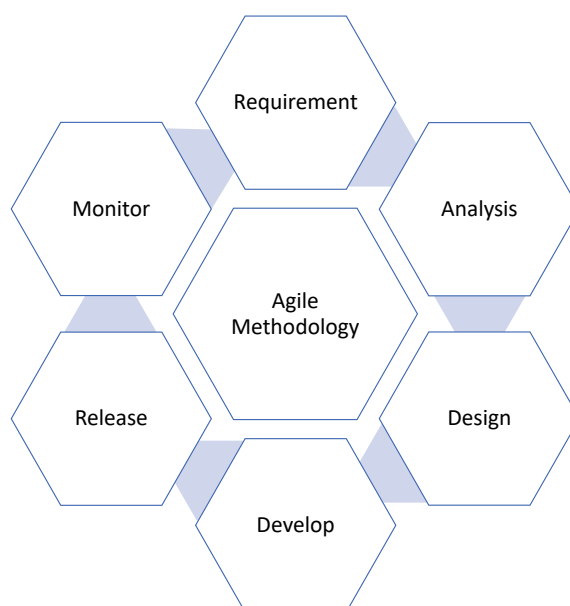

**Figure S1.** The key principles of Agile Methodology.

**Supplementary Part III—Cost Effectiveness****Table S2.** Capex investment.

| Tool          | Description             | License     | Environment  | Type     | Qty | Cost per Unit  | Total |
|---------------|-------------------------|-------------|--------------|----------|-----|----------------|-------|
| Raspbian      | Operating System        | Open-Source | Debian       | OS       | NA  | Free of charge | NA    |
| Docker        | Container management    | Open-Source | Debian       | Software | NA  | Free of charge | NA    |
| Kubernetes    | Container orchestration | Open-Source | Debian       | Software | NA  | Free of charge | NA    |
| InfluxDB      | database tool           | Open-Source | Container    | Software | NA  | Free of charge | NA    |
| Grafana       | Visualization tool      | Open-Source | Container    | Software | NA  | Free of charge | NA    |
| OpenVPN       | VPN management          | Open-Source | Container    | Software | NA  | Free of charge | NA    |
| Apache        | web server              | Open-Source | Debian       | Software | NA  | Free of charge | NA    |
| Mosquitto     | MQTT Server             | Open-Source | Raspbian     | Software | NA  | Free of charge | NA    |
| Raspberry PI  | SoC                     | 4B          | Raspbian     | Hardware | 1   | 68\$           | 68\   |
| Node32        | SoC                     | 32          | Node         | Hardware | 1   | 10\$           | 10\   |
| NRF24L01      | wirless connection      | -           | 2.4 GHz      | Hardware | 2   | 1\$            | 2\$   |
| ESP8266       | wirless connection      | -           | Wifi         | Hardware | 1   | 1\$            | 1\$   |
| DHT11         | Air Temp Humidity       | -           | -            | Hardware | 1   | 1\$            | 1\$   |
| DHT22         | Air Temp Humidity       | Humidity    | -            | Hardware | 1   | 3\$            | 3\$   |
| FC-28         | Soil moisture           | -           | -            | Hardware | 1   | 1\$            | 1\$   |
| BMP085        | Air Temp Humidity       | Pressure    | -            | Hardware | 1   | 1\$            | 1\$   |
| PB200-286     | Solar Radiation         | -           | -            | Hardware | 1   | 3\$            | 3\$   |
| Arduino Micro | -                       | -           | Arduino frim | Hardware | 1   | 11\$           | 11\$  |
| Arduino Uno   | -                       | -           | Arduino frim | Hardware | 1   | 20\$           | 20\$  |
| Anemometer    | wind speed direction    | -           | -            | Hardware | 1   | 55\$           | 55\$  |
| Total Cost    |                         |             |              |          |     |                | 176\$ |

**Table S3.** Opex investment.

| Item        | Description                         | Unit                     | Qty              | Value          |
|-------------|-------------------------------------|--------------------------|------------------|----------------|
| Operation   | Power consumption Raspberry         | 0.12\$/KWh               | 5.47 kWh/1 month | 0.7\$          |
| Operation   | Power consumption Arduino Uno       | 0.12\$/KWh               | 0.82 kWh/1 month | 0.1\$          |
| Operation   | Power consumption Arduino Mega      | 0.12\$/KWh               | 0.67 kWh/1 month | 0.1\$          |
| Domain      | Website name registration           | 1.2\$/month              | 1 month          | 1.2\$          |
| Web hosting | Cloud infrastructure                | 12\$/month               | 1 month          | 12\$           |
| Maintenance | Equipment Maintenance               | Open-Source              | 1 resource       | Free of charge |
| Rent        | Space for BS installation (Housing) | \$/m <sup>3</sup> /month | 1 enclosure      | Free of charge |
| Total Cost  |                                     |                          |                  | 14.1\$         |

**Supplementary Part IV—LSTM Model**

**LSTM structure** LSTM approach relies on the principle of gates to control the long-term sequence of information flux for a specific duration. The LSTM network Figure S2 can be seen as three gates, input gate  $i$ , output gate  $o$ , and a forget gate  $f$ :

- the input gate with its activation Vector  $i_t$  determines the information flux that should enter the cell,

$$i_t = \sigma(W_{xi}x_t + W_{hi}h_{t-1} + W_{ci}c_{t-1} + b_i). \quad (S1)$$

- the output gate with its activation Vector  $o_t$  determines the information flux that should pass to the next cell,

$$o_t = \sigma(W_{xo}x_t + W_{ho}h_{t-1} + W_{co}c_t + b_o). \quad (S2)$$

- the forget gate with its activation Vector  $f_t$  determines the information flux that should be saved in the network's memory or should be forgotten,

$$f_t = \sigma(W_{xf}x_t + W_{hf}h_{t-1} + W_{cf}c_{t-1} + b_f), \quad (S3)$$

$$c_t = f_t \odot c_{t-1} + i_t \odot \tanh(W_{xc}x_t + W_{hc}h_{t-1} + b_c), \quad (S4)$$

$$h_t = o_t \odot \tanh(c_t). \quad (S5)$$

In our model, a Rectified Linear unit (ReLU) function Equation (S6) is used as an activation function of the deployed neurons:

$$\sigma(x) = \begin{cases} 0 & \text{for } x < 0, \\ x & \text{for } x \geq 0. \end{cases} \quad (S6)$$

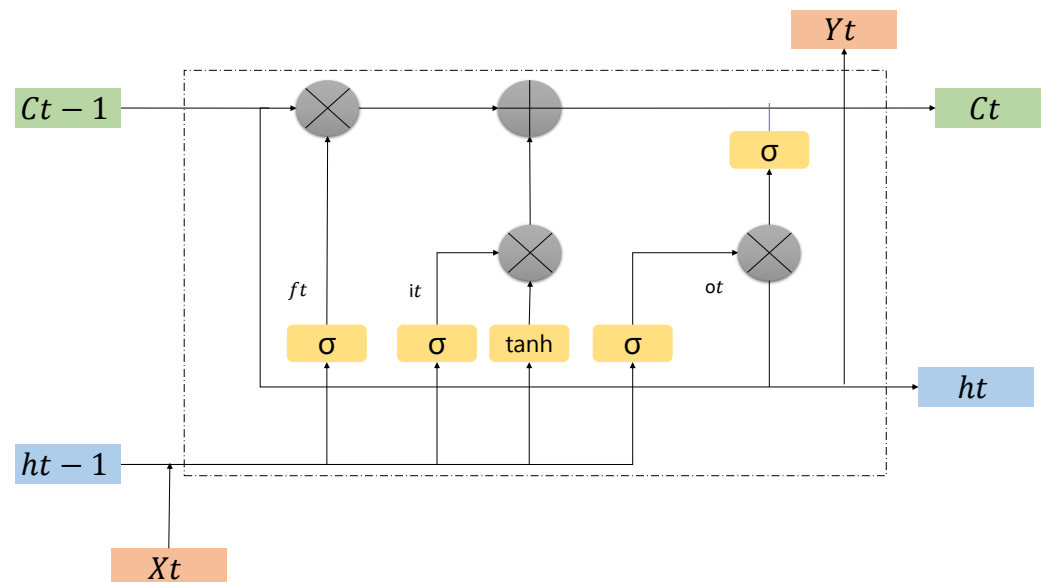

**Figure S2.** The structure of a single cell within LSTM.

The LSTM network learns from long and short-term features in the studied training dataset. Therefore, the usage of non relevant data sources, or an adequate learning and optimization process may lead towards a wrong or unclear predictions. Thus, in our work we implement the workflow depicted in Figure S3 to achieve the best optimum results.

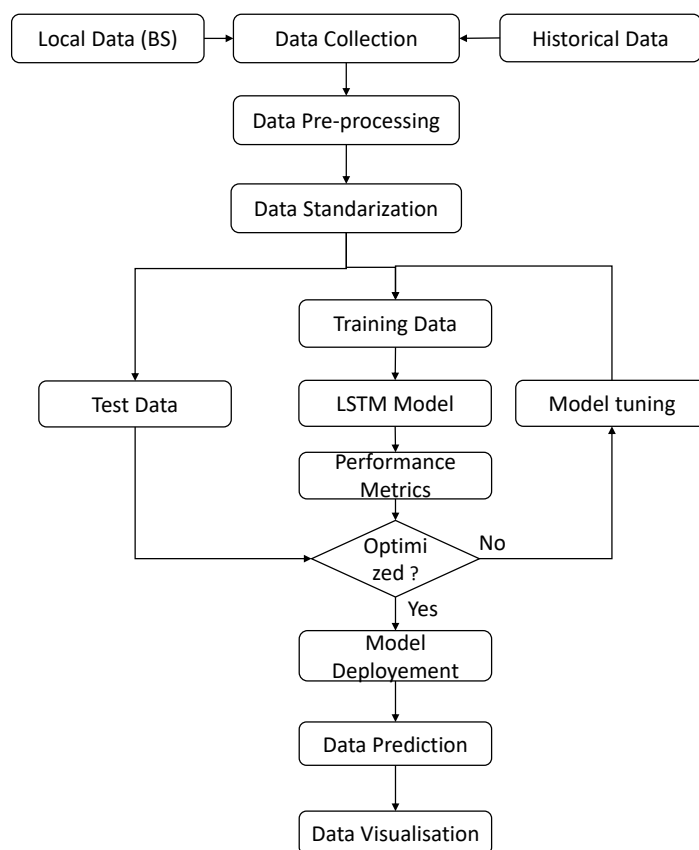

**Figure S3.** Model work flow of a single cell.

### Supplementary Part V—Feature Correlation

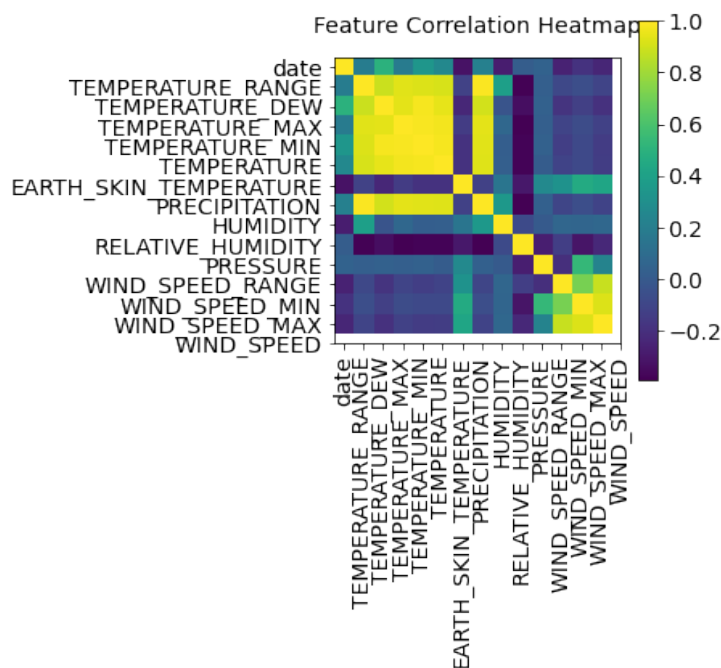

**Figure S4.** Feature selection using heat map method.

## Supplementary Part VI—Model Validation

We plot the model results after each epoch which shows improvement of the relationship between prediction and real values throughout the iterations. The data correlation trending throughout the rounds is presented in Figure S5.

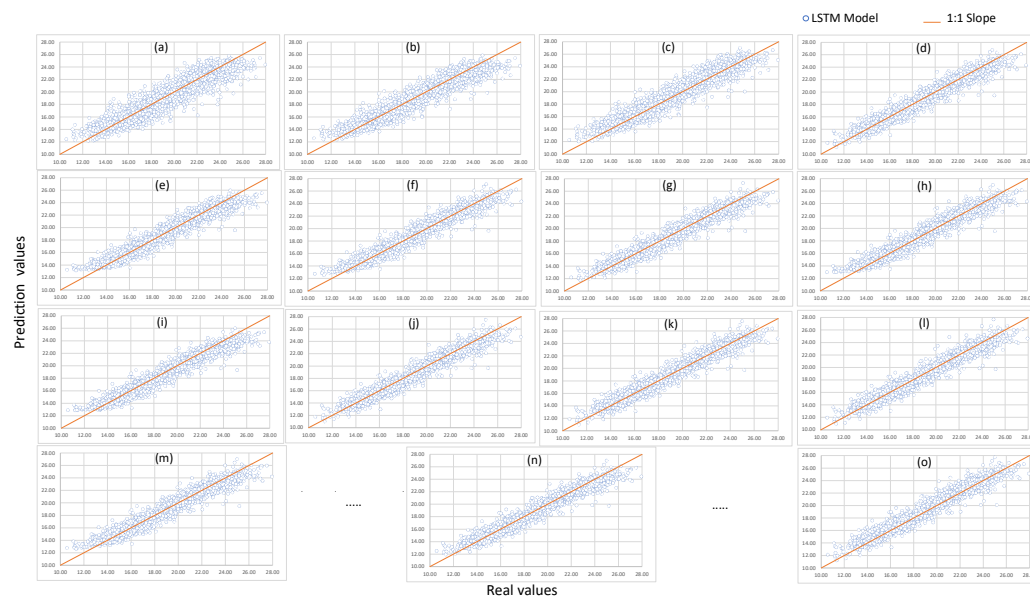

**Figure S5.** Scatter plot—Real values vs prediction values.

The daily residual values are illustrated in Figure S6 for 1 month, 1 year, and 8 years. Meanwhile, it is visible that there are some residual peaks that varies in worst case between 3.6 and  $-5.08$ .

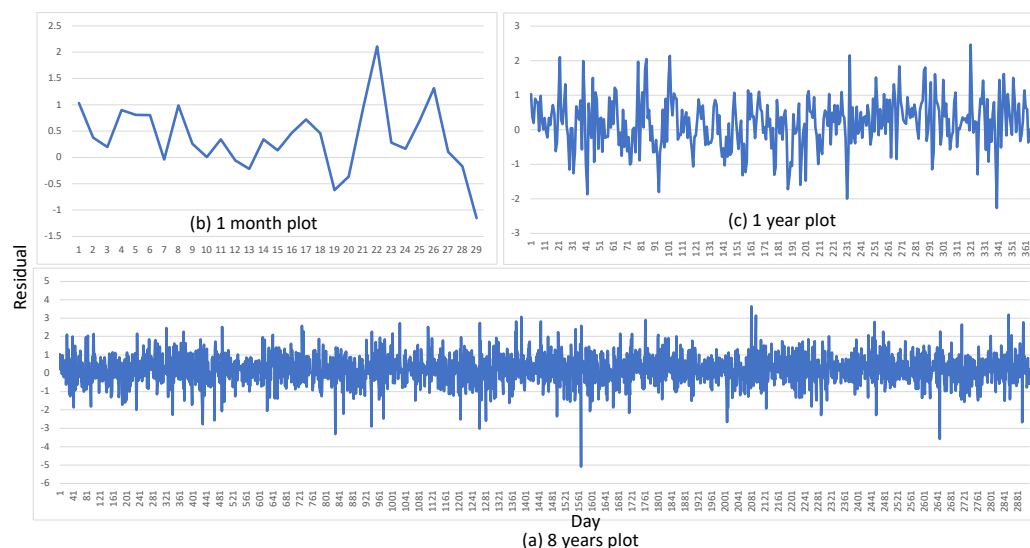

**Figure S6.** Residual plot—Multi-timeframe presentation. (a) daily Residual plot for 8 years (entire dataset). (b) daily Residual plot for 1 month. (c) daily Residual plot for 1 year.

Even though the outliers are clearly displayed on the scatter we can see in Table S4 that 51% of the prediction are within the range of  $[0\text{ }^{\circ}\text{C}, 1\text{ }^{\circ}\text{C}]$ , 30% are within the range of  $[-1\text{ }^{\circ}\text{C}, 0\text{ }^{\circ}\text{C}]$ , 12% of the records are within  $[1\text{ }^{\circ}\text{C}, 2\text{ }^{\circ}\text{C}]$ , while only 7% of remaining records are beyond these ranges.

**Table S4.** Range and percentage of deviation records.

| Deviation Range (°C) | Number of Records | Percentage |
|----------------------|-------------------|------------|
| $\leq -5$            | 1                 | 0%         |
| $-4--3$              | 3                 | 0%         |
| $-3--2$              | 19                | 1%         |
| $-2--1$              | 113               | 4%         |
| $-1-0$               | 881               | 30%        |
| $0-1$                | 1497              | 51%        |
| $1-2$                | 361               | 12%        |
| $2-3$                | 37                | 1%         |
| $>3$                 | 5                 | 0%         |
| Total Records        | 2917              | 100%       |

**Supplementary Part VII**

In the Table S5 we present the major advantages and challenges that we detected during the analysis of different systems. We also categorize the existing platforms based on various metrics such as the validation environment. Additionally, we assess the systems' cost effectiveness based on deployed hardware and software. Finally, we categorized the usage of some features such as operation and maintenance, remote accessibility, and AI implementation.

**Table S5.** Comparison between the proposed platform and other existing platforms.

| Ref  | Advantages                                                                                                                                                | Challenges                                                                                                                            | Validation   | Cost   | O&M | Security | Remote Access | AI  |
|------|-----------------------------------------------------------------------------------------------------------------------------------------------------------|---------------------------------------------------------------------------------------------------------------------------------------|--------------|--------|-----|----------|---------------|-----|
| [20] | *Low-cost based agro-ecological management system.<br>*Adoption WSN technology.<br>*System based on lightweight protocols.                                | *High power consumption due to WSN.<br>*Reliability issue when nodes go off                                                           | Simulation   | Medium | No  | No       | No            | No  |
| [21] | *IoT-based platform for precision agriculture.<br>*A real-time system for epidemic disease control.<br>*Adoption of Solar panel for energy supply.        | *Power supply will be impacted by the weather.<br>*Unreliable central unit (based on Arduino).<br>*Fully based on wired nodes.        | Experimental | Medium | No  | No       | No            | Yes |
| [22] | *A real-time monitoring system for farmers.<br>*Implementation of an Expert Advisory System to improve crop productivity .                                | *High power consumption based on WSN adoption.<br>*Reliability concern when nodes go off in WSN.<br>Conceptual model need validation. | Simulation   | Low    | No  | No       | No            | Yes |
| [23] | *An IoT-based low-cost system for smart irrigation.<br>*The system is based on MQTT, and Neural Network (NN) for intelligent decision-making              | *System complexity is high since it relies on wired nodes.<br>*System only supports MQTT based nodes.                                 | Experimental | High   | No  | No       | No            | Yes |
| [24] | *low-cost platform for smart farming<br>*development of an user-friendly interface.                                                                       | *System rely only on Power Bank for motherboard supply.<br>*Conceptual model need to be validated on field                            | Experimental | High   | No  | No       | No            | No  |
| [25] | *Proposition of an adaptive network mechanism for a reliable smart farming system.<br>*The system implements LoRaWAN and IEEE protocols for transmission. | *Lack of end-to-end platform presentation and focus only on the transmission layer.                                                   | Experimental | Low    | No  | No       | No            | No  |
| [26] | *An experimental analysis of energy harvesting for IoT devices.<br>*Adoption of IoT devices with energy harvesting capabilities.                          | *Usage of basic limited HW for validation (Arduino Uno).<br>limited resources (memory, computation, etc)                              | Experimental | Low    | No  | No       | No            | No  |

**Table S5.** *Cont.*

| Ref  | Advantages                                                                                                                                                | Challenges                                                                                                                        | Validation   | Cost   | O&M | Security | Remote Access | AI  |
|------|-----------------------------------------------------------------------------------------------------------------------------------------------------------|-----------------------------------------------------------------------------------------------------------------------------------|--------------|--------|-----|----------|---------------|-----|
| [27] | *An IoT system for precise ecological monitoring in agriculture domains.<br>*Adoption of a friendly GUI for different users.<br>*System open for upgrade. | *System high complexity because of lack of global GUI.<br>*Gateway play role of central unit if node goes off system will be off. | Experimental | High   | No  | No       | No            | No  |
| [28] | *Introduction of an architectural approach based on Farm Management Information System (FMIS)                                                             | *Conceptual model need implementation for validation.                                                                             | Simulation   | High   | No  | No       | Yes           | No  |
| [29] | *An energy efficient weather station.<br>*System focused on the algorithm optimization.                                                                   | *System addresses only energy challenge.                                                                                          | High         | No     | No  | No       | No            | No  |
| [30] | *An UAV and IoT-based platform for smart farming.<br>*Low-cost architecture to predict environmental data in large farms.                                 | *High power consumption due to non-optimized communications.<br>*lack or AI-based approach to enhance the overall performance.    | Experimental | Low    | No  | No       | No            | Yes |
| [52] | *LoRa based architecture.<br>*Low-cost system.<br>*Modular framework.<br>*Web-based visualization tool.                                                   | *System rely on single transmission protocol (LoRaWAN)<br>*Power consumption                                                      | Experimental | High   | No  | No       | No            | No  |
| [53] | *System support SMS-based notification.<br>*Low-cost platform.<br>*Usage of ML for crop prediction.                                                       | *A conceptual model need to be tested in production environment                                                                   | Simulation   | High   | No  | No       | No            | Yes |
| [54] | *Fuzzy and ANN based weather station for temperature forecasting.<br>*Usage of solar panels.                                                              | *Power supply will be impacted by the weather.                                                                                    | Experimental | Medium | No  | No       | Yes           | Yes |
| [55] | *Low-cost system for smart water irrigation.<br>*Sel-reorganised WSN-based architecture.<br>*Web-based application for users.                             | *High power consumption.                                                                                                          | Experimental | High   | No  | No       | No            | No  |
| [56] | *Low-cost system.<br>*ML-based for rainfall prediction.                                                                                                   | *Trivial communication model.                                                                                                     | Simulation   | High   | No  | No       | No            | Yes |
| [57] | *Platform based on deployment heterogeneous nodes.<br>*Platform based on UAV.                                                                             | *High power consumption due to the wireless communication.                                                                        | Simulation   | Low    | No  | No       | No            | No  |



Table S5. Cont.

| Ref  | Advantages                                                                                                                                                                                                                                                                                                                                                                                                                                                                                                                                                                                     | Challenges                                                                                                                                                                                                                                                                                        | Validation   | Cost | O&M | Security | Remote Access | AI  |
|------|------------------------------------------------------------------------------------------------------------------------------------------------------------------------------------------------------------------------------------------------------------------------------------------------------------------------------------------------------------------------------------------------------------------------------------------------------------------------------------------------------------------------------------------------------------------------------------------------|---------------------------------------------------------------------------------------------------------------------------------------------------------------------------------------------------------------------------------------------------------------------------------------------------|--------------|------|-----|----------|---------------|-----|
| [58] | *UAV-based framework for agriculture.<br>*adoption of smart energy-harvesting model.                                                                                                                                                                                                                                                                                                                                                                                                                                                                                                           | *System had some limitations like limited and short coverage.<br>*Unreliable data transmission.                                                                                                                                                                                                   | Experimental | Low  | No  | No       | No            | No  |
| [59] | *An IoT-based AgroTech is proposed for urban farming<br>*System allows close monitoring of temperature, humidity, and soil moisture.*System's reliability is verified based on error modeling..                                                                                                                                                                                                                                                                                                                                                                                                | *Very challenging in power consumption.                                                                                                                                                                                                                                                           | Experimental | Low  | No  | No       | No            | No  |
| AWS  | *An agile AI and IoT-augmented weather station.<br>*A real-time weather station for smart farming support multi-user multi-profile architecture.<br>*A fully containerized-based architecture for continuous upgrade.<br>*A system based on Plug-and-Play wireless nodes.<br>*A multi-agent-based weather station.<br>*System supports alarms, notification and automation.<br>*Implementation of a sophisticated Operation and Maintenance dashboard for the BS control.<br>*System offer high quality temperature forecasting based on LSTM.<br>*System support Quality of Experience (QoE). | *Consideration of extension to support Lora, Sigfox, and NBIoT.<br>*Need the design and implementation of solar panel-based solution for energy consumption.<br>*real-time synchronization of the offline dashboard with the website: <a href="https://ensem-aws.tk/">https://ensem-aws.tk/</a> . | Experimental | Low  | Yes | Yes      | Yes           | Yes |
