# Supplementary material
Source: MDPI journal article supplement (https://www.mdpi.com/2077-0472/12/1/35)

# ENSEM-AWS Agro-Weather Station

Uptime

# 8.1 hours

CPU Temperature ▾

# 51.1 °C

CPU usage

# 42.8%

# ENSEM-AWS Agro-Weather Station

CPU usage

# 42.8%

RAM usage

# 25.7%

IOWait

# 0.21%

LA medium

# 2.8

# ENSEM-AWS Agro-Weather Station

pi: mmcblk0p2: write 24.8 io/s  
pi: mmcblk0: write 24.8 io/s

Disk I/O bytes for /dev

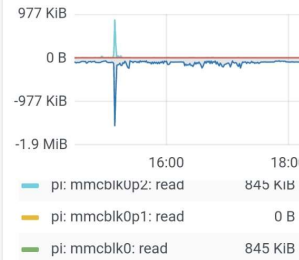

Disk I/O time for /dev

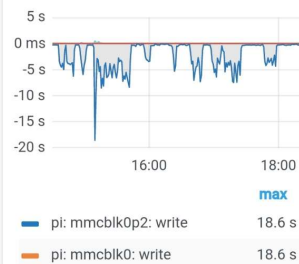

# ENSEM-AWS Agro-Weather Station

Health Check

CPU load

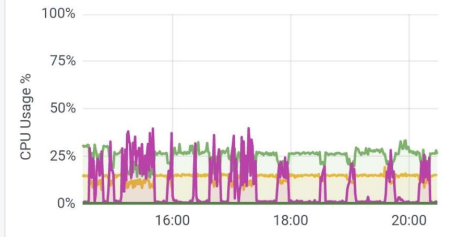

|            | min    | max   | avg   | current ▾ |
|------------|--------|-------|-------|-----------|
| pi: user   | 13.6%  | 33.2% | 24.8% | 26.0%     |
| pi: system | 7.10%  | 19.1% | 13.5% | 14.7%     |
| pi: iowait | 0.241% | 39.7% | 8.37% | 1.20%     |

Memory load

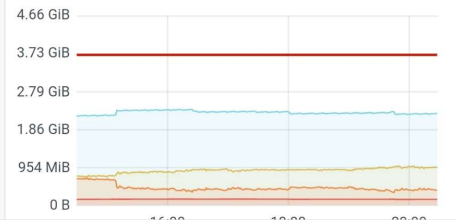

Supplement: s1 [file s1]
