# Supplementary material
Source: MDPI journal article supplement (https://www.mdpi.com/2077-0472/12/1/35)
Supplement: s1 [file s1]

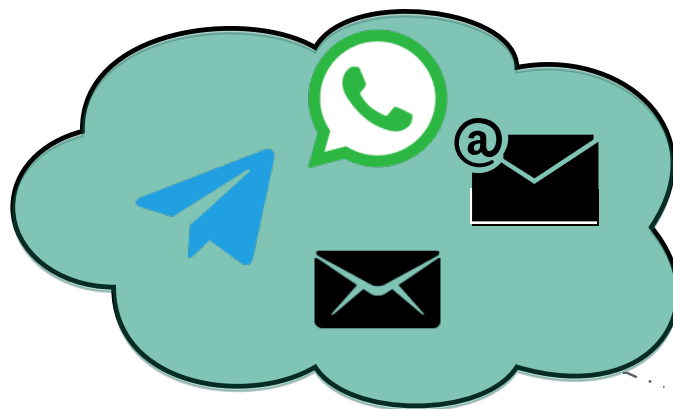

Communication Agent

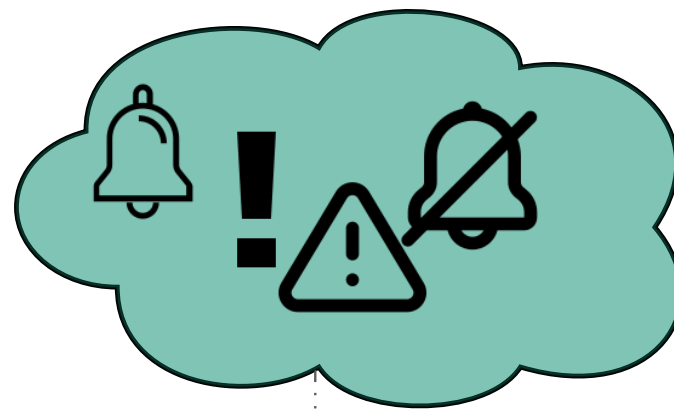

Alert Agent

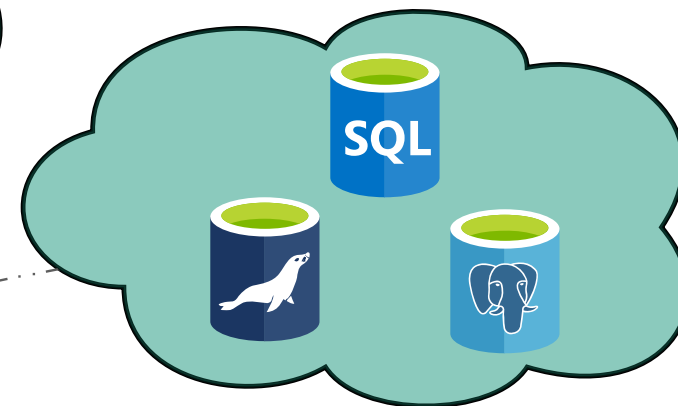

Database Agent

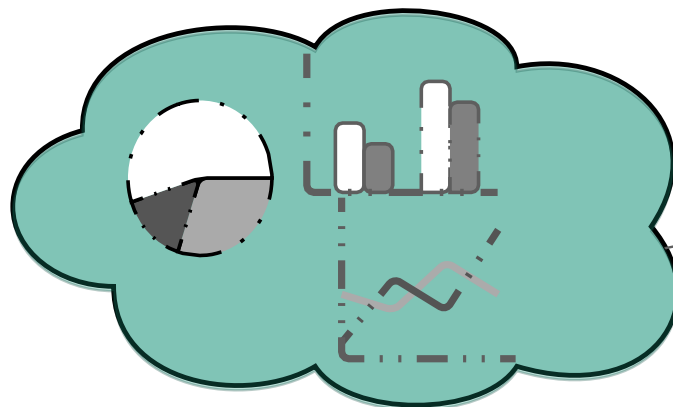

Graphical Agent

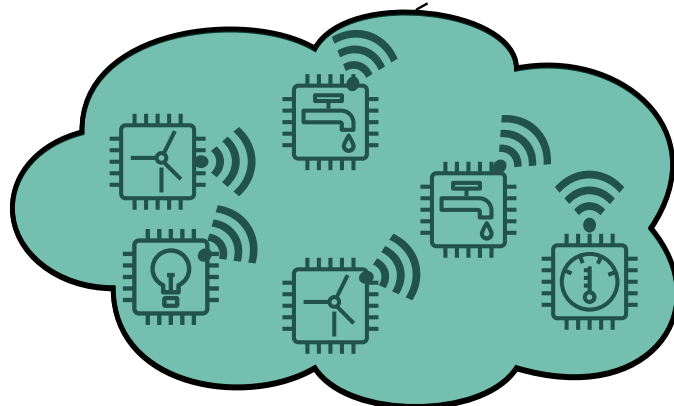

Sensor Agent

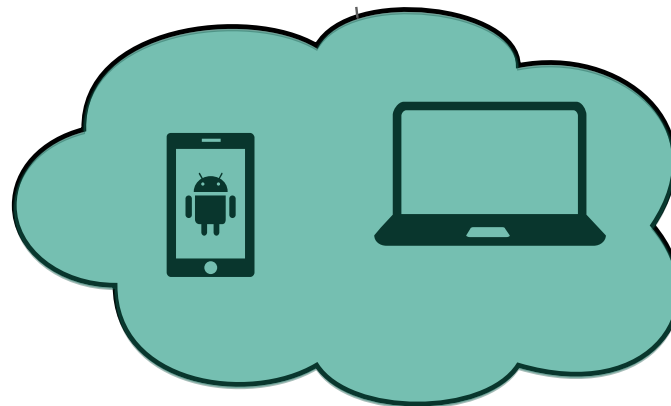

Display Agent

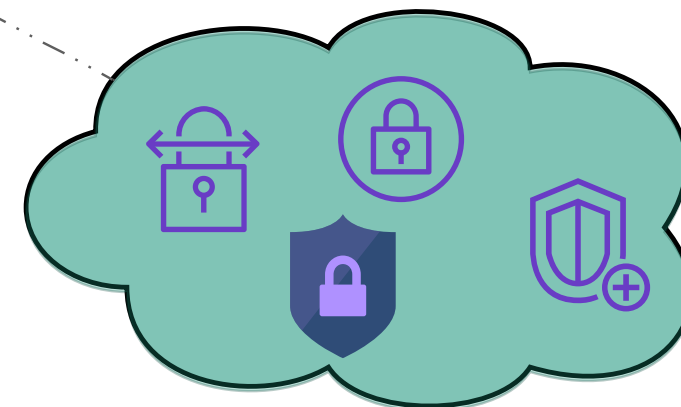

VPN Agent

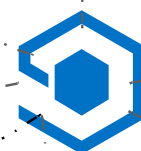

Multi-Layer  
Middelware
