# Supplementary material
Source: MDPI journal article supplement (https://www.mdpi.com/2077-0472/12/1/35)

# ENSEM-AWS Agro-Weather Station

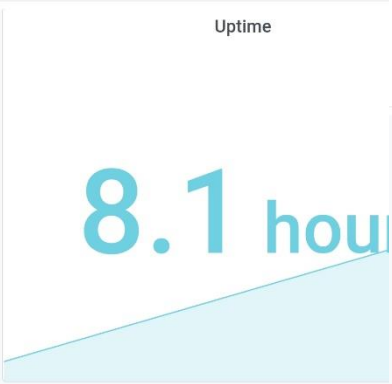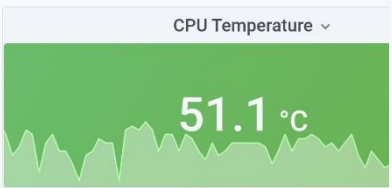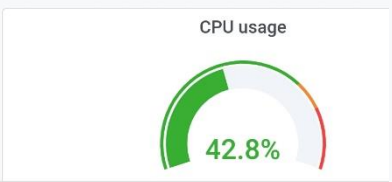

# ENSEM-AWS Agro-Weather Station

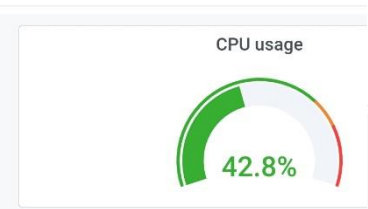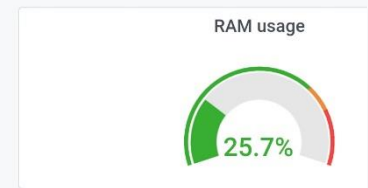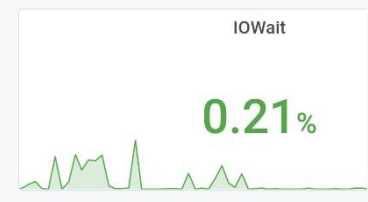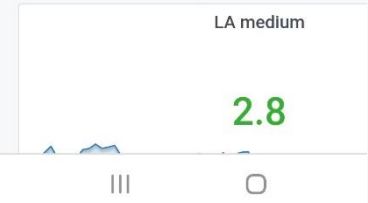

# ENSEM-AWS Agro-Weather Station

|                      |           |
|----------------------|-----------|
| pi: mmcblk0p2: write | 24.8 io/s |
| pi: mmcblk0: write   | 24.8 io/s |

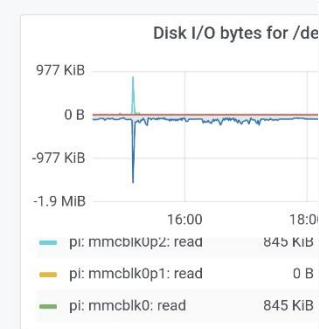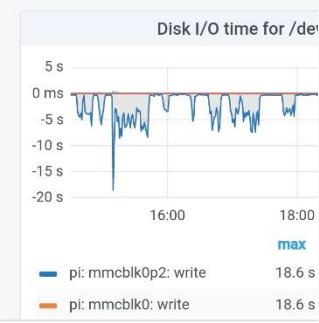

# ENSEM-AWS Agro-Weather Station

## Health Check

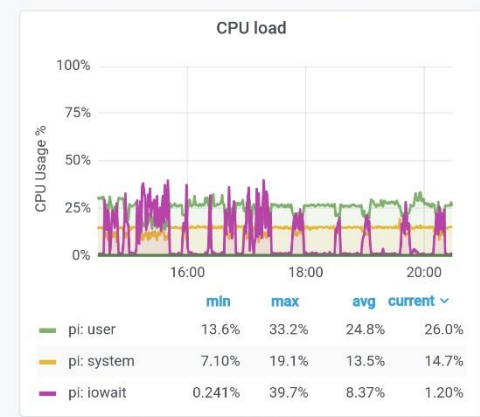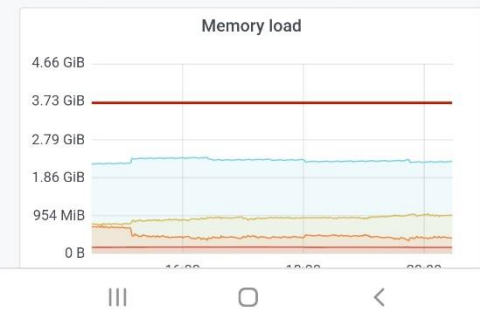

Supplement: s1 [file s1]
