# Supplementary material
Source: MDPI journal article supplement (https://www.mdpi.com/2077-0472/12/1/35)

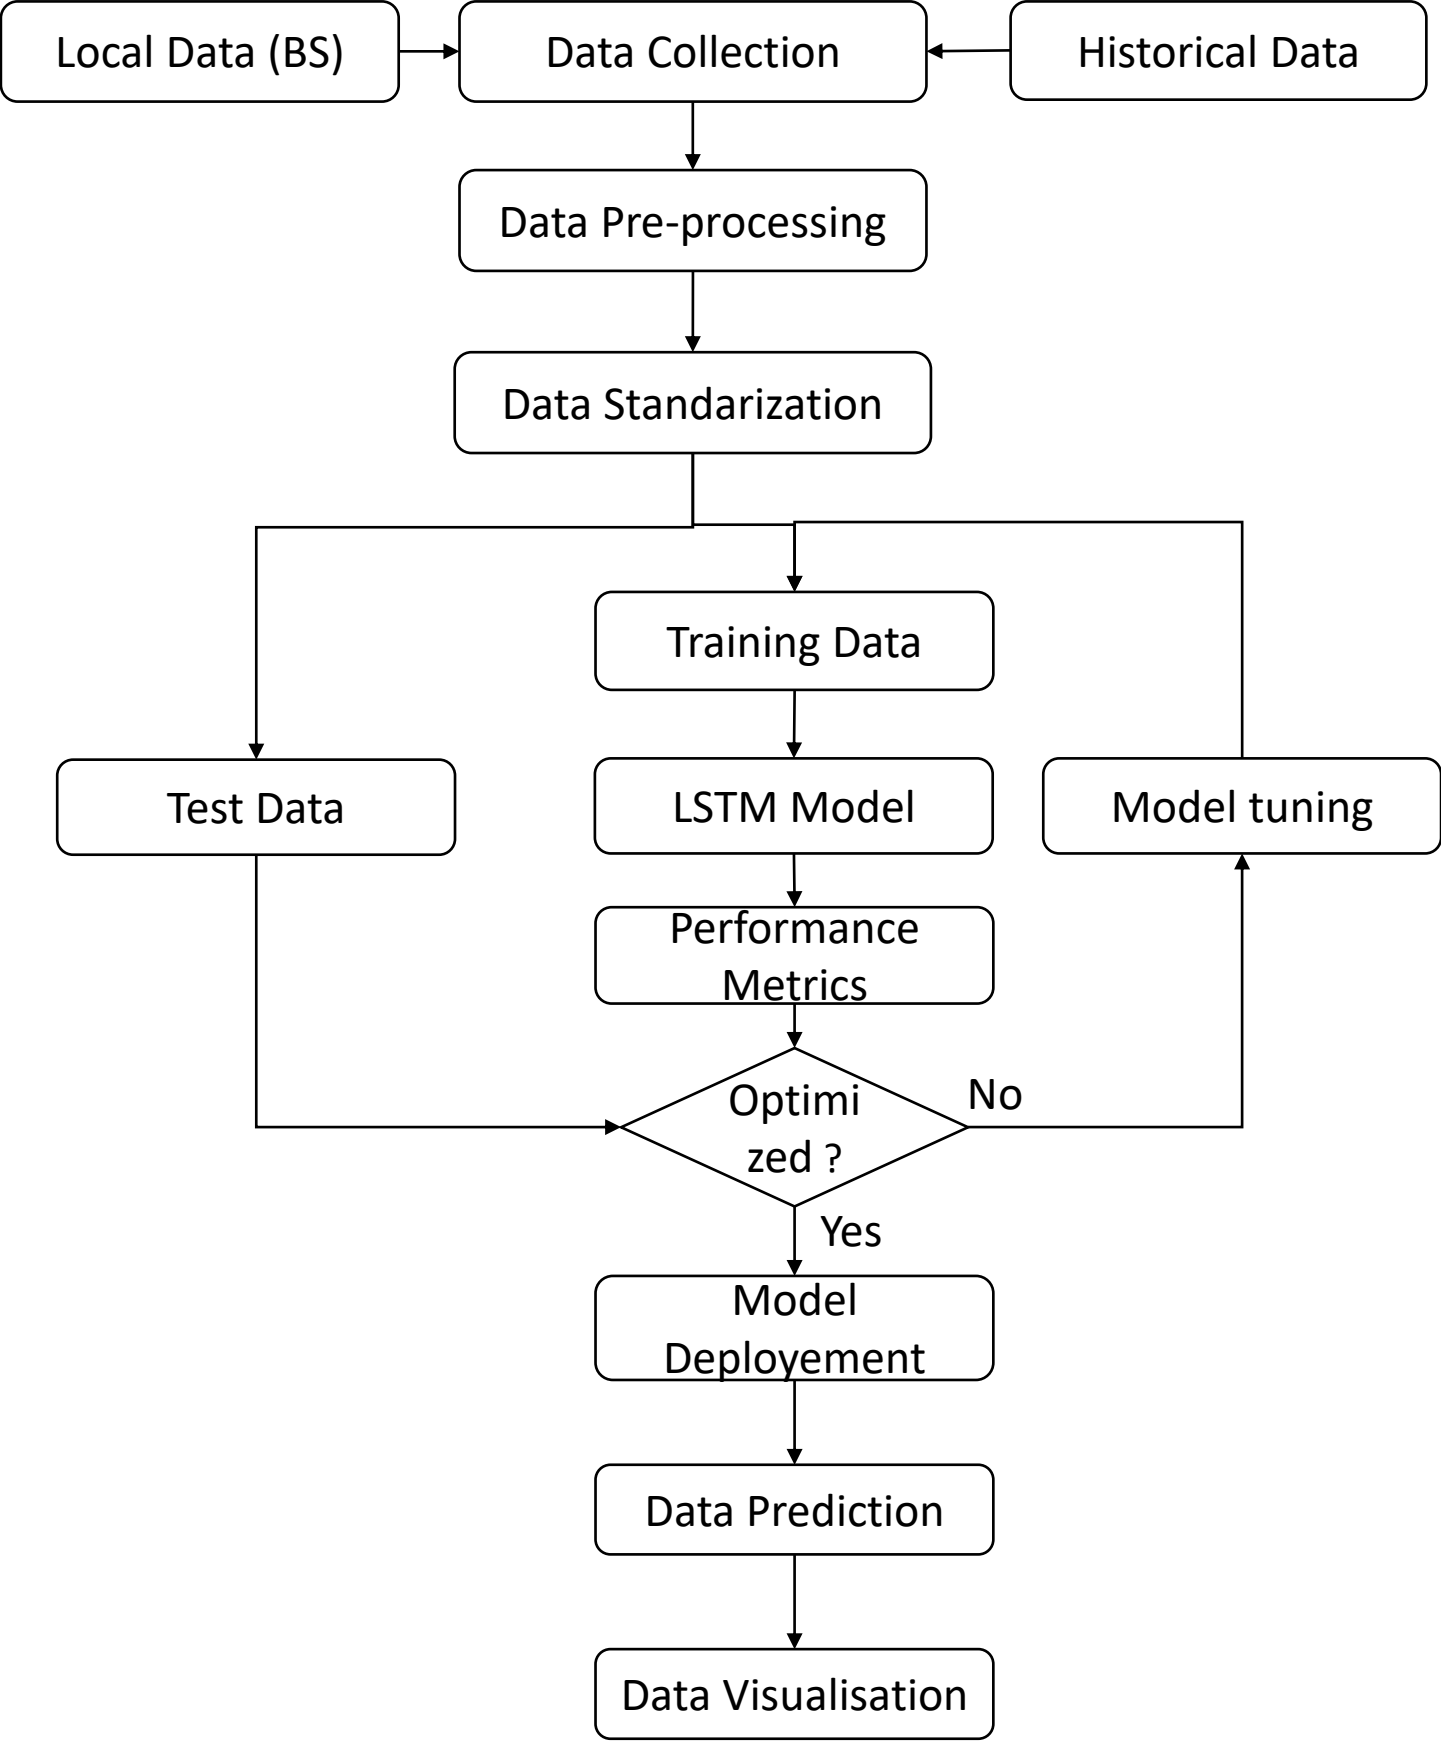

Supplement: s1 [file s1]

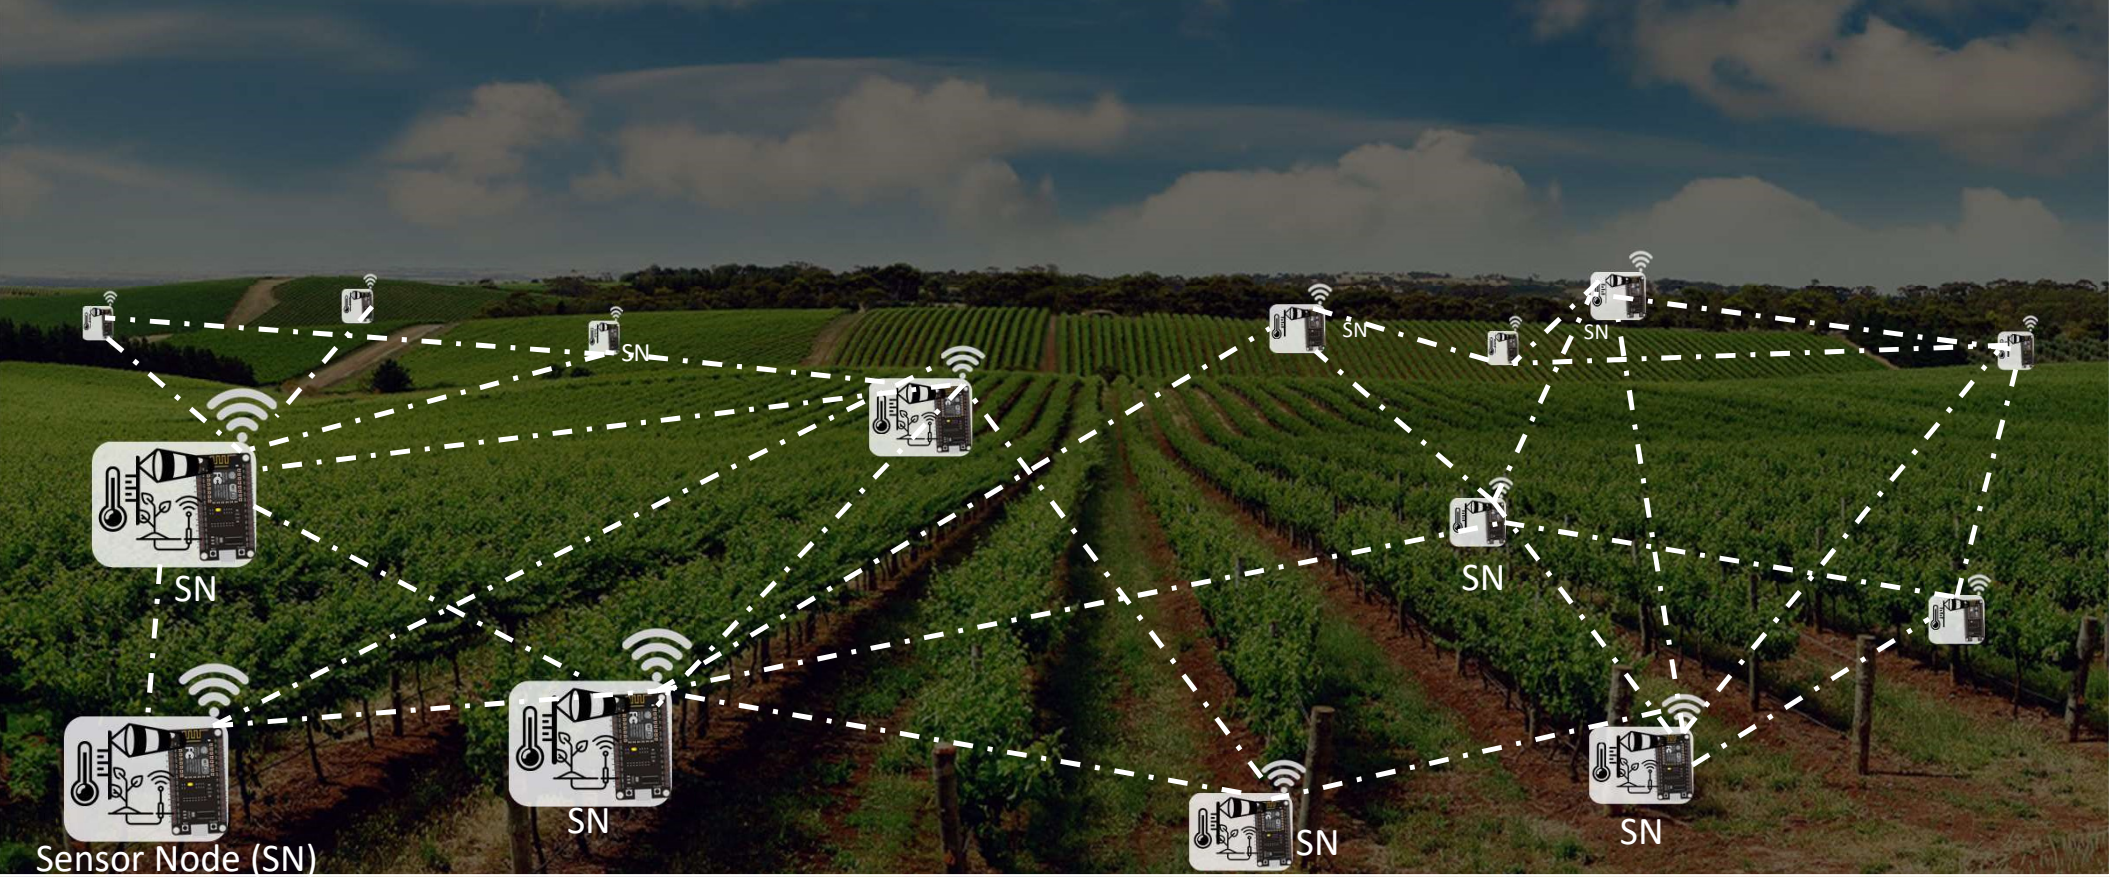

Sensor Node (SN)

Supplement: s1 [file s1]

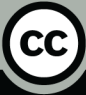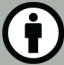

BY

Supplement: s1 [file s1]

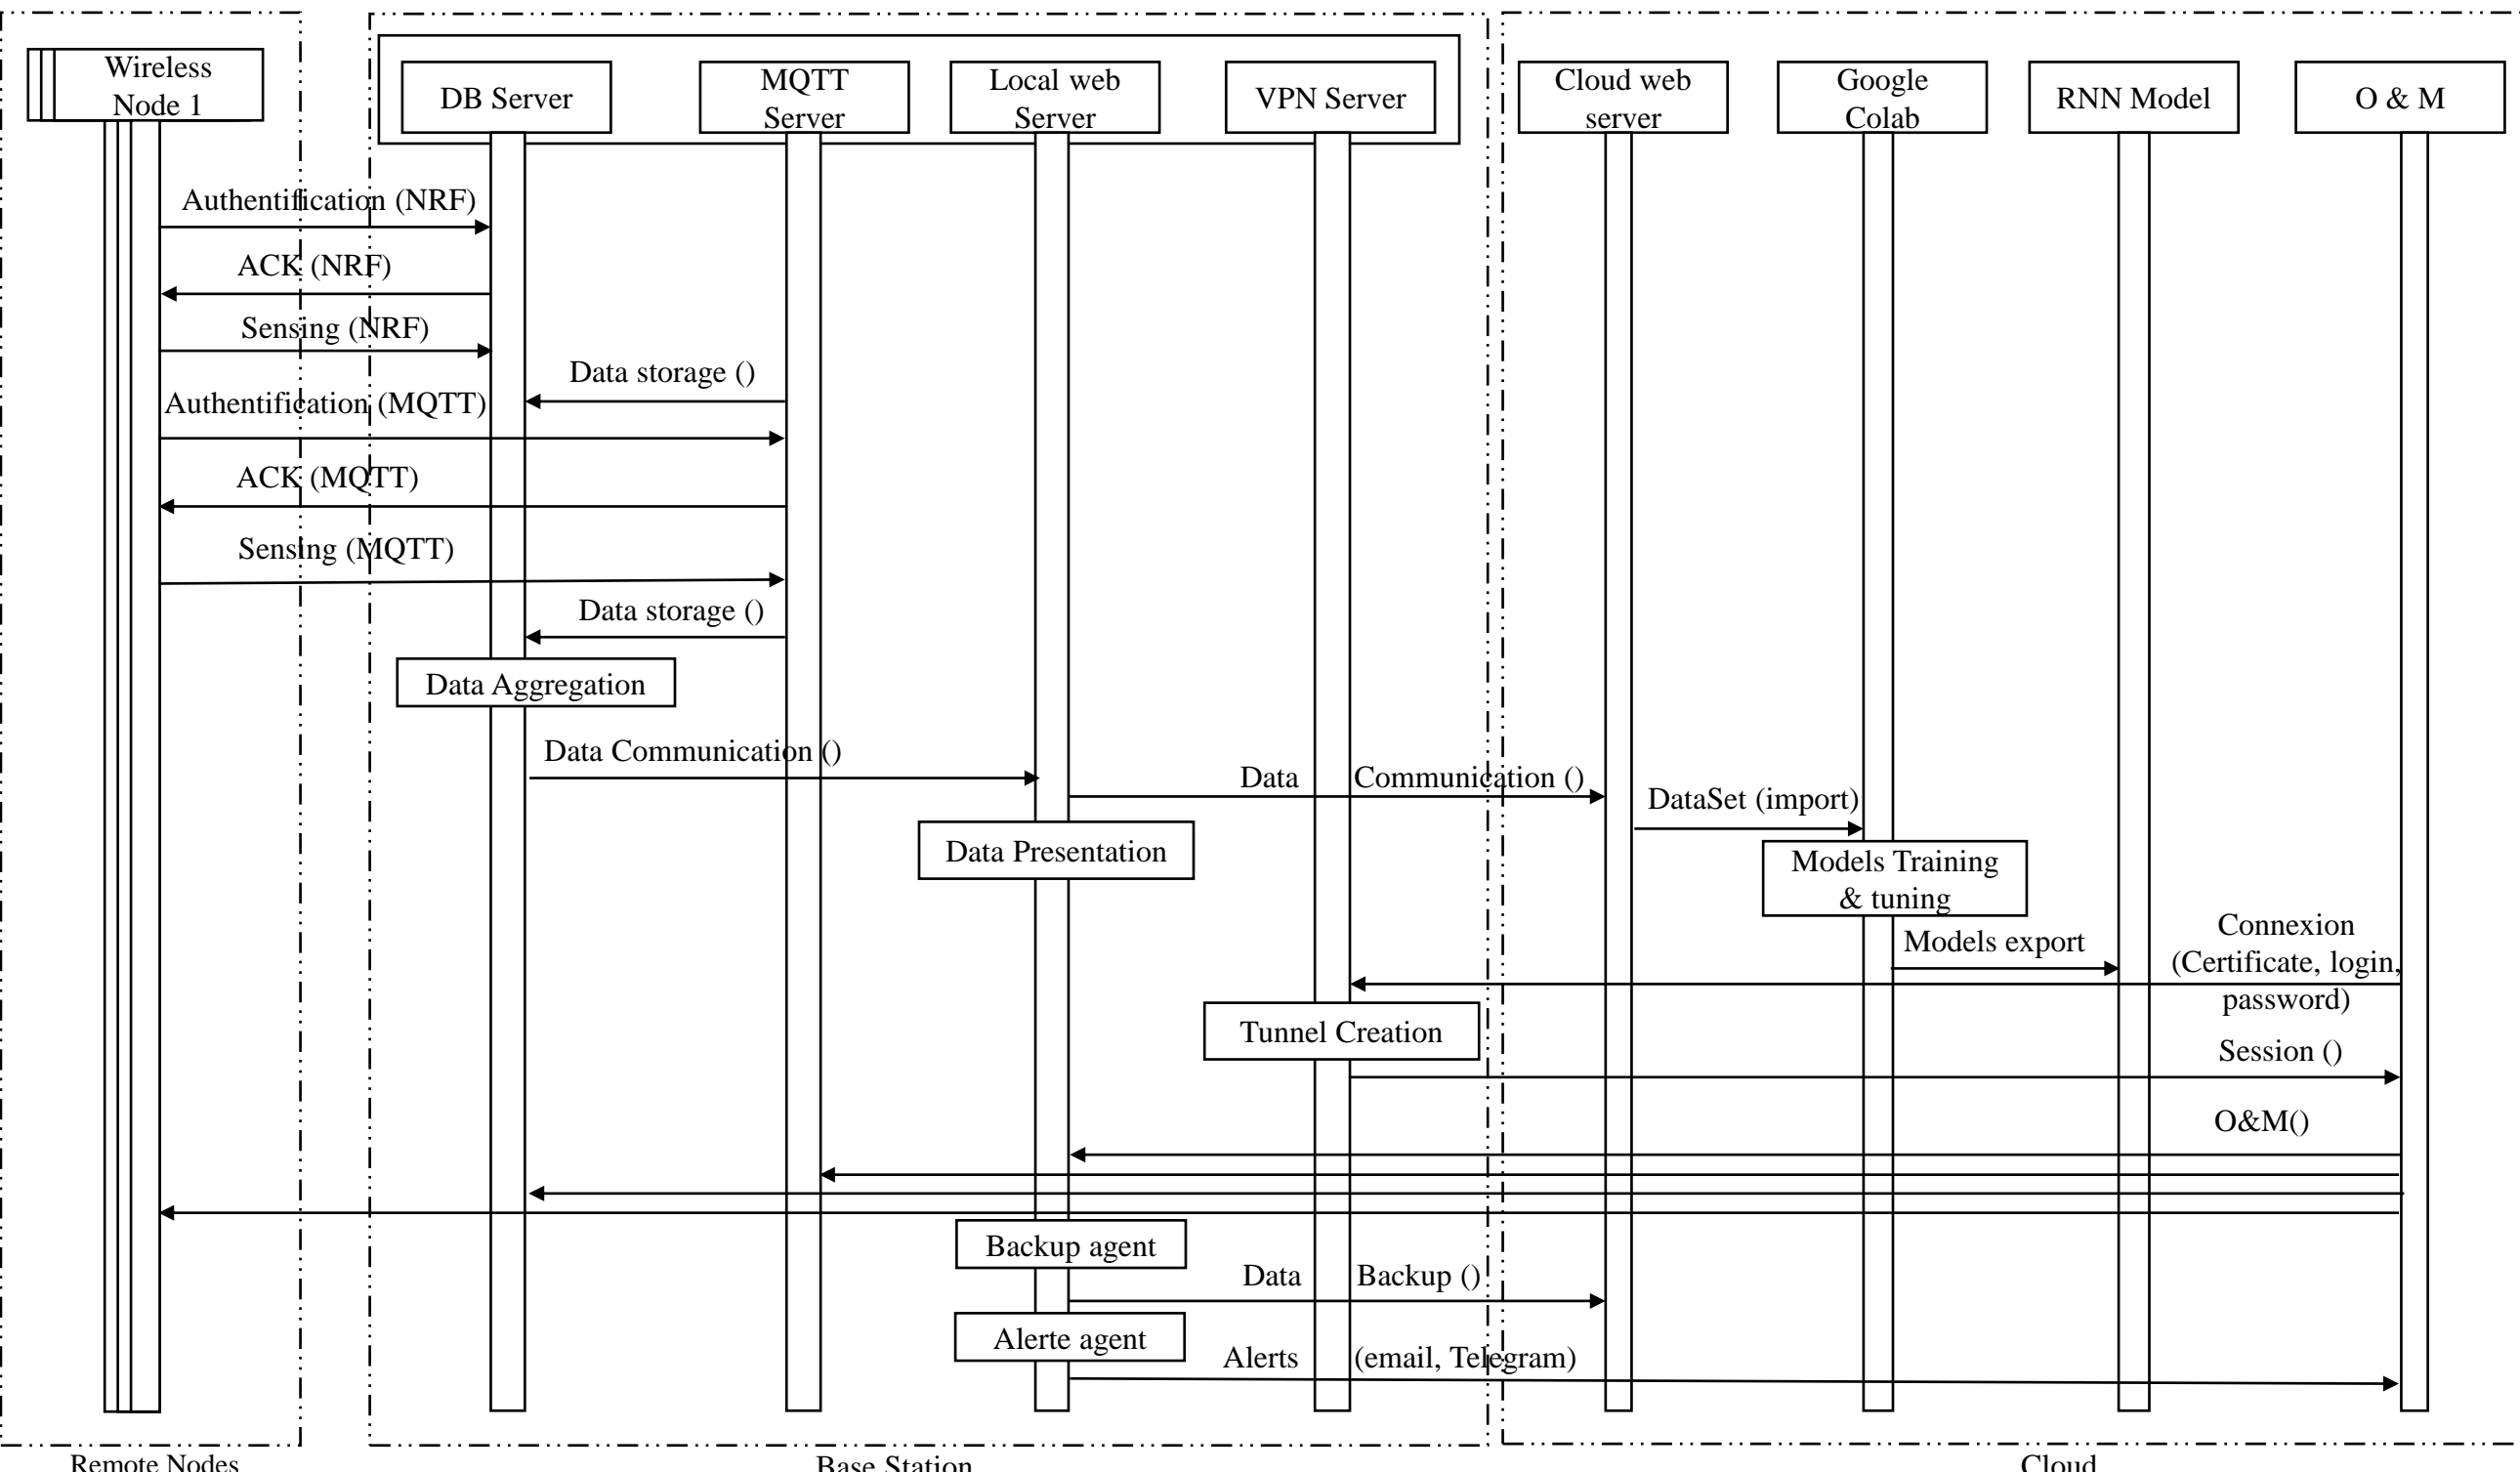

Supplement: s1 [file s1]

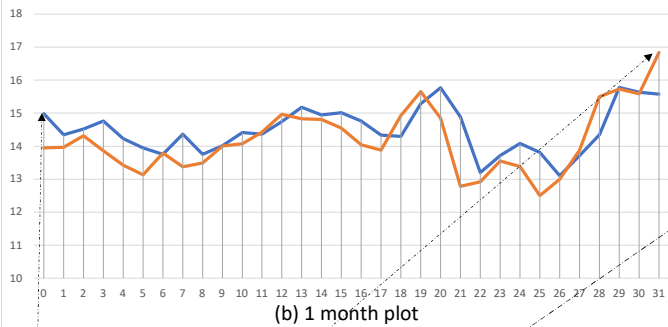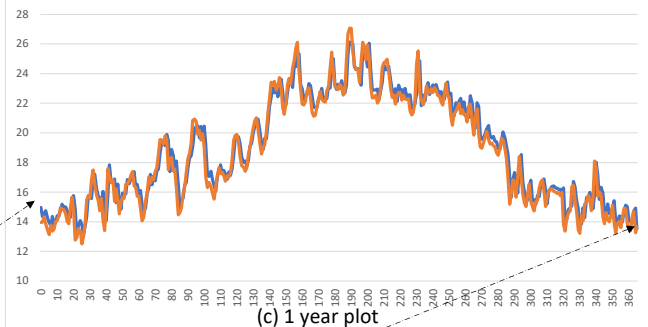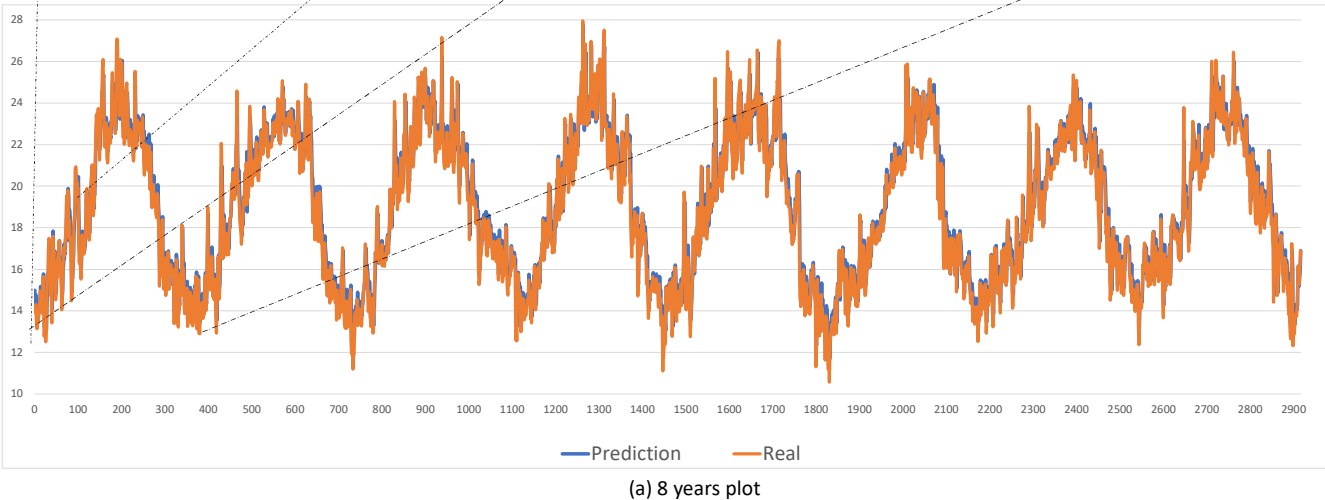

Supplement: s1 [file s1]

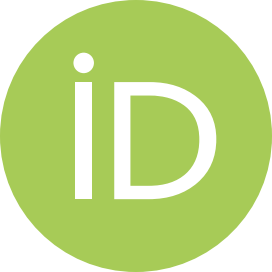

Supplement: s1 [file s1]

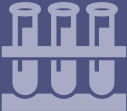

*applied  
sciences*

Supplement: s1 [file s1]

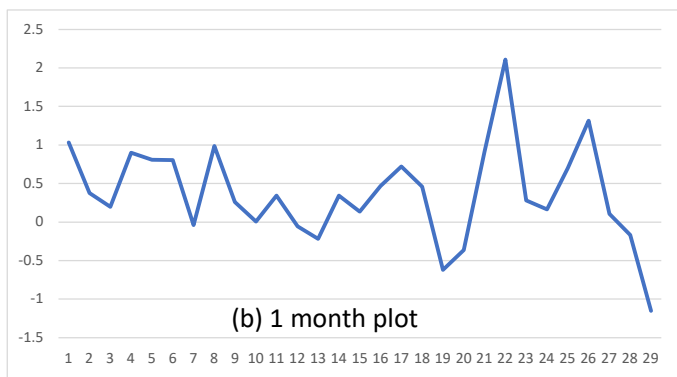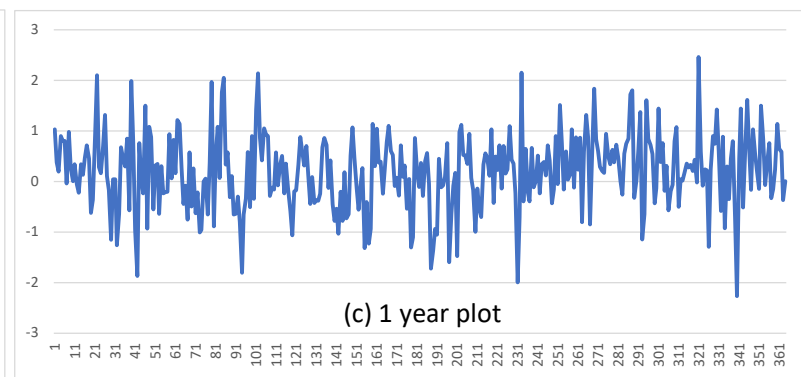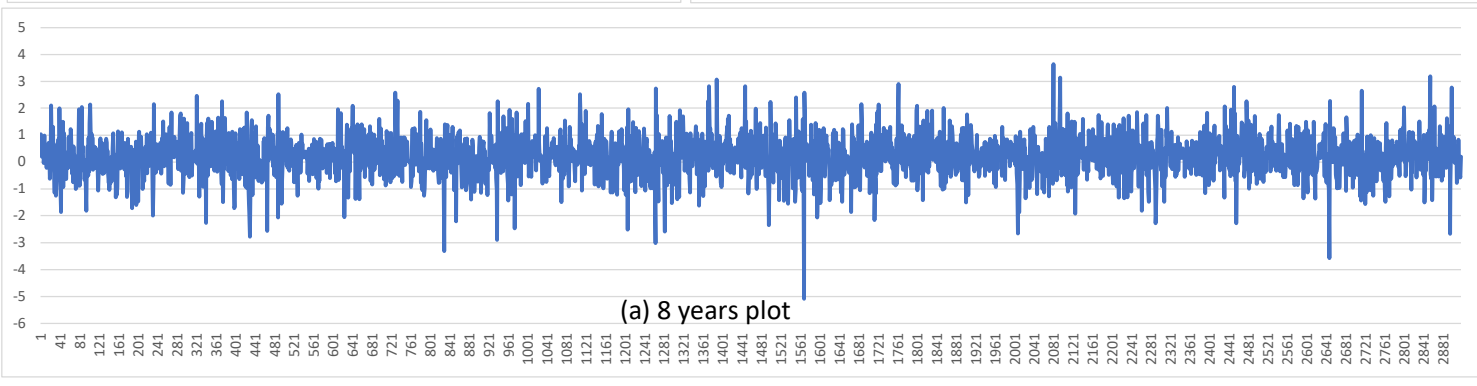

Supplement: s1 [file s1]

Humidity %

120%  
100%  
80%  
60%  
40%  
20%  
0%

10:00 AM 10:20 AM 10:40 AM 11:00 AM 11:20 AM 11:40 AM 12:00 PM 12:20 PM 12:40 PM 1:00 PM 1:20 PM 1:40 PM 2:00 PM 2:20 PM 2:40 PM 3:00 PM 3:20 PM 3:40 PM 4:00 PM 4:20 PM 4:40 PM 5:00 PM 5:20 PM 5:40 PM 6:00 PM 6:20 PM

Time

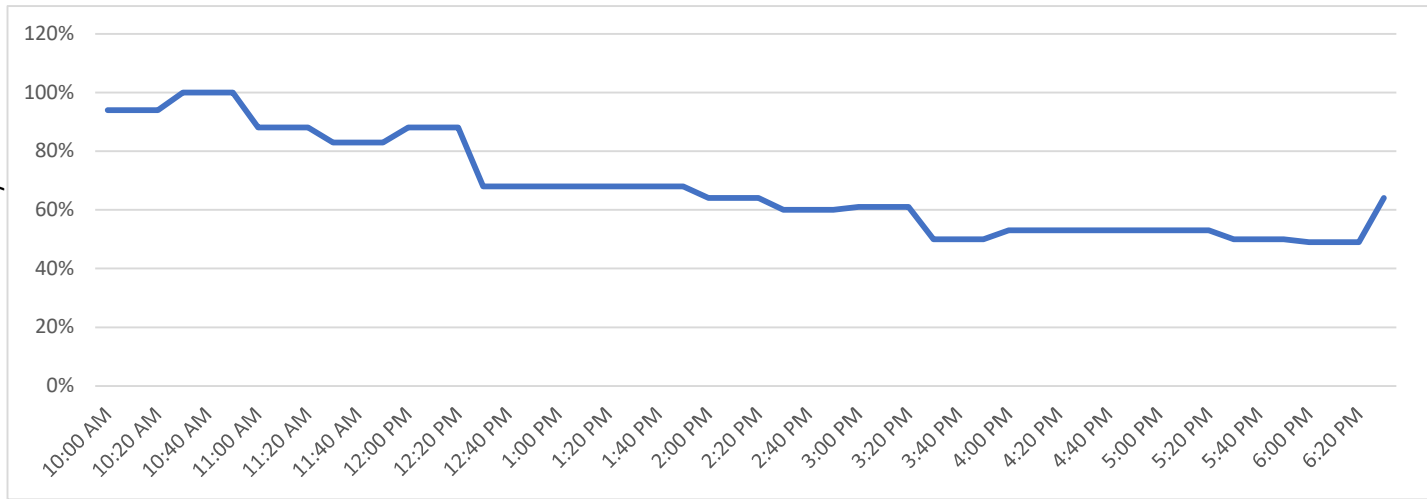

Supplement: s1 [file s1]

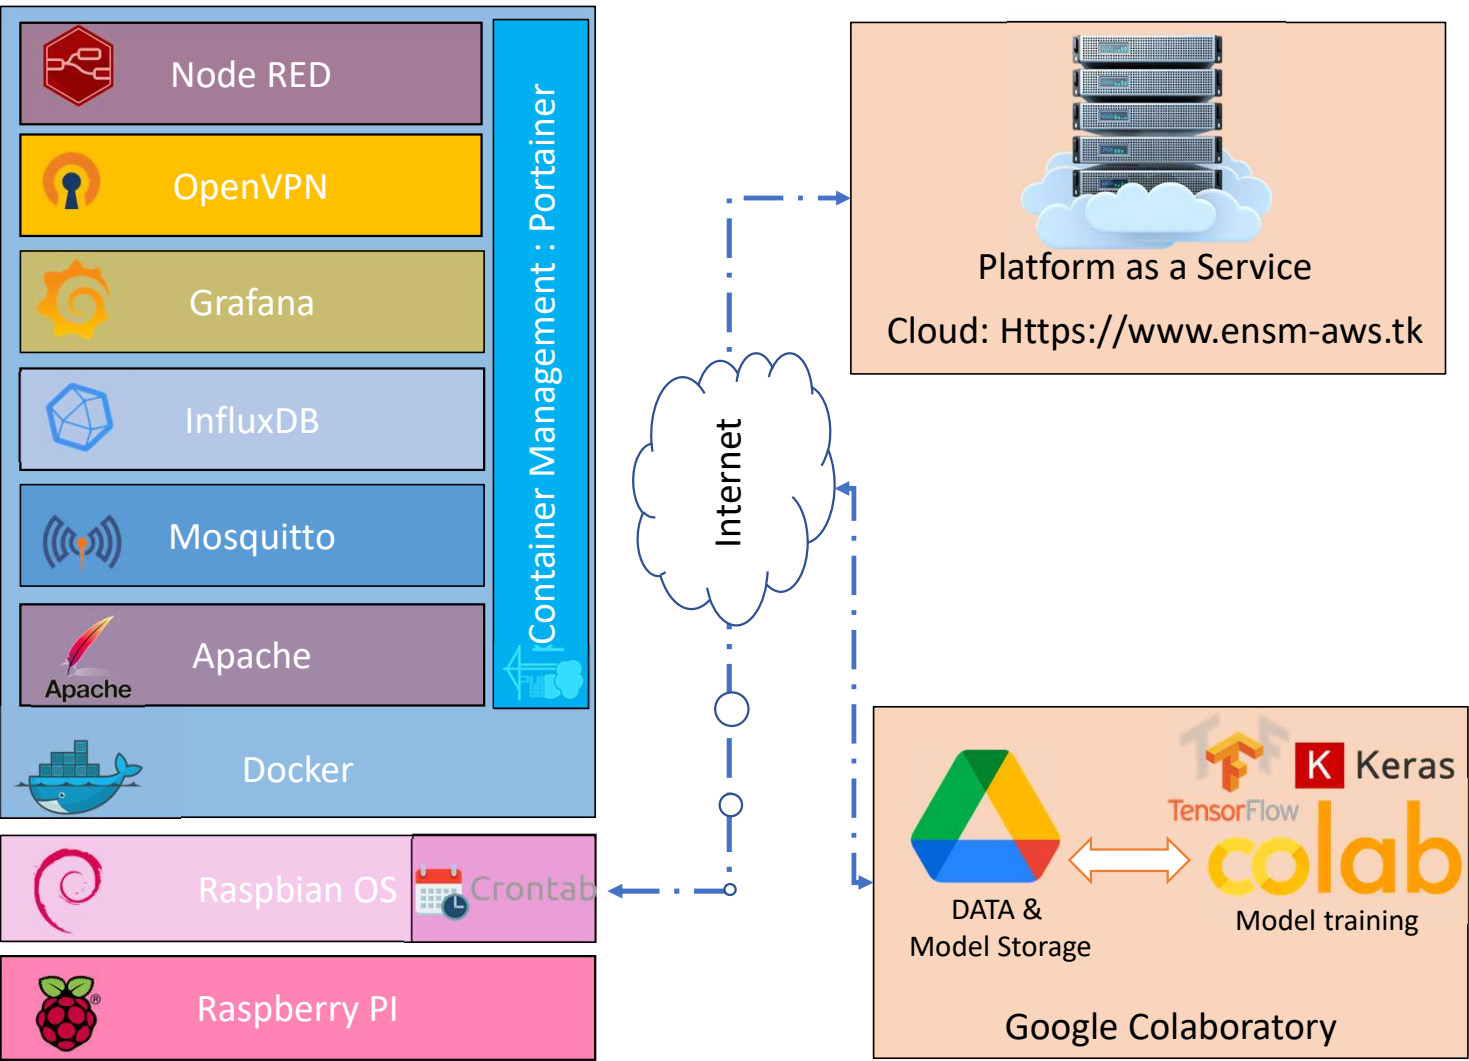

Supplement: s1 [file s1]

■ 4-8 km/h ■ 8-12 km/h ■ 12-16 km/h ■ 20-24 km/h

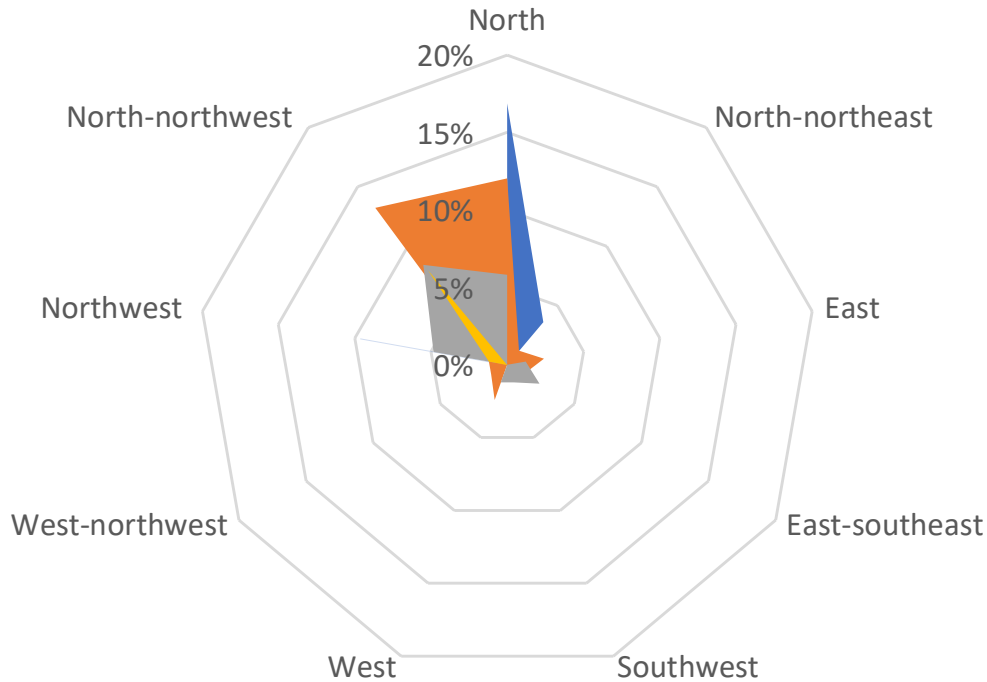

Supplement: s1 [file s1]

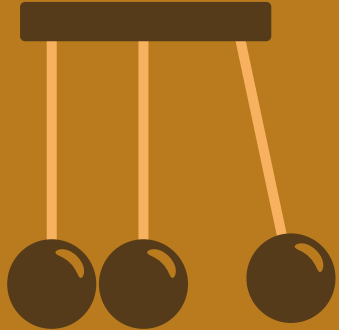

*physical sciences  
forum*

Supplement: s1 [file s1]

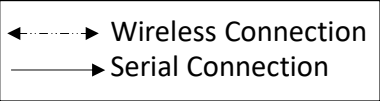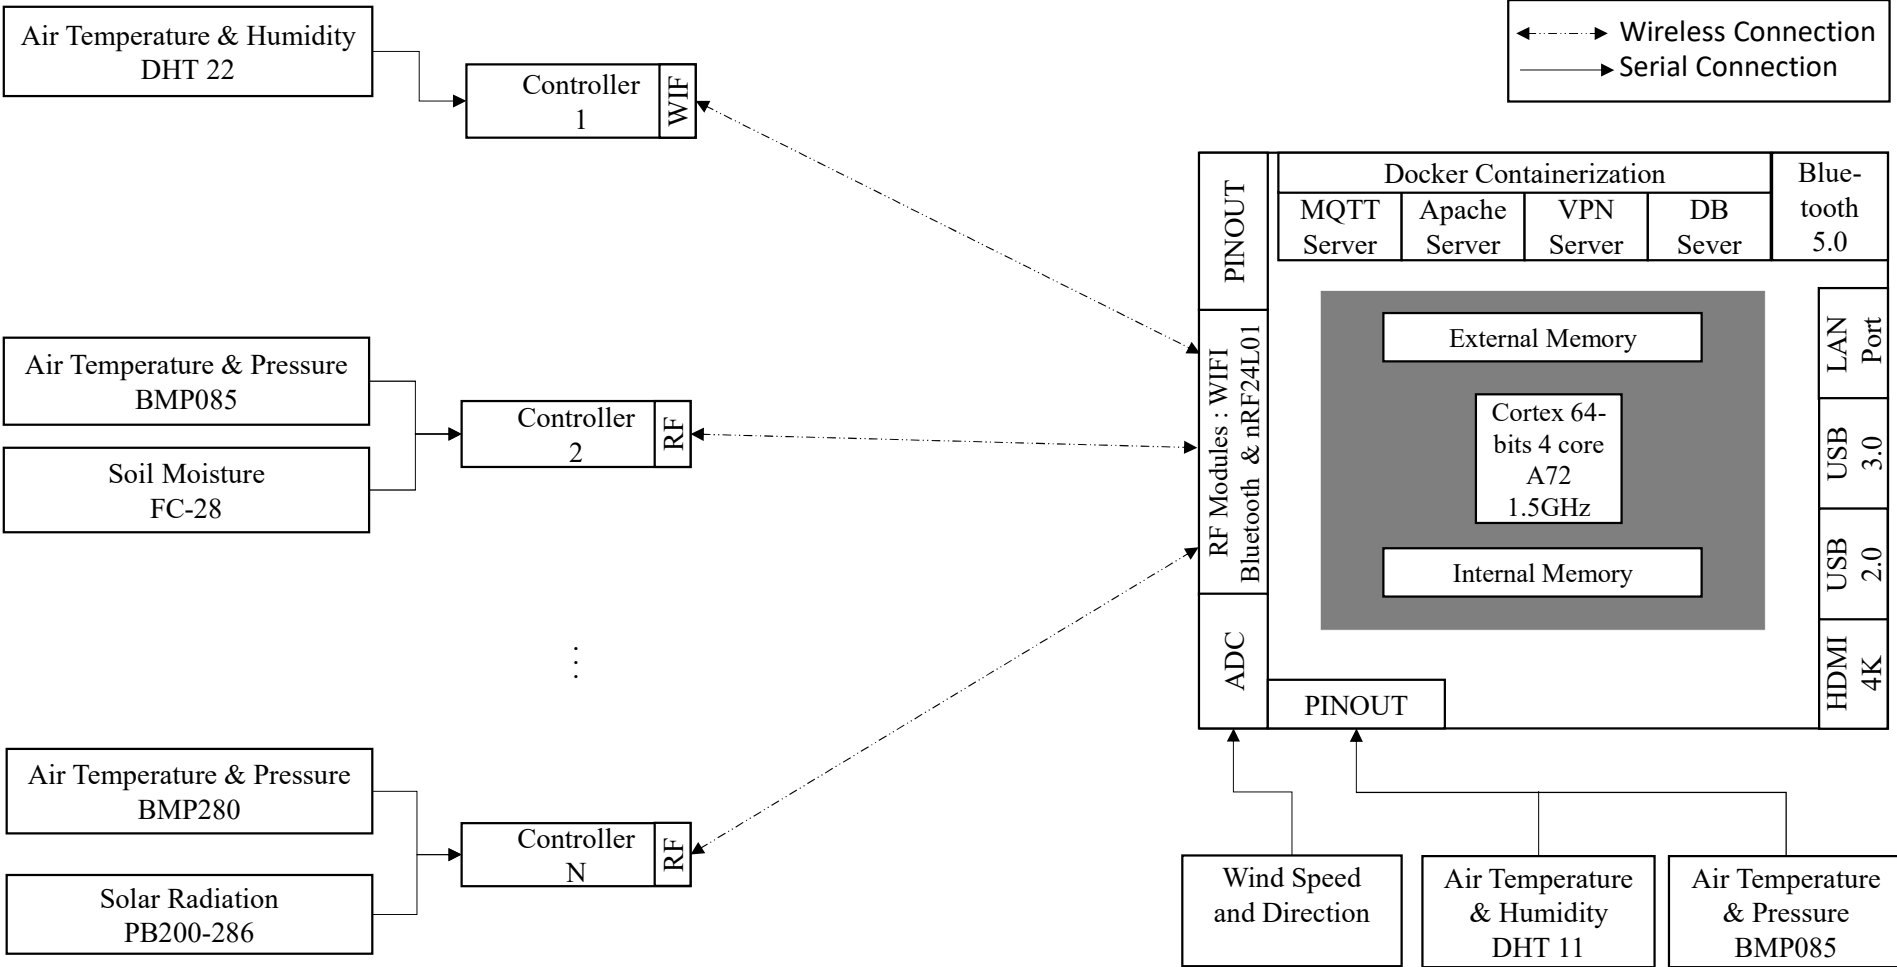

Supplement: s1 [file s1]

Temperature °C

Time

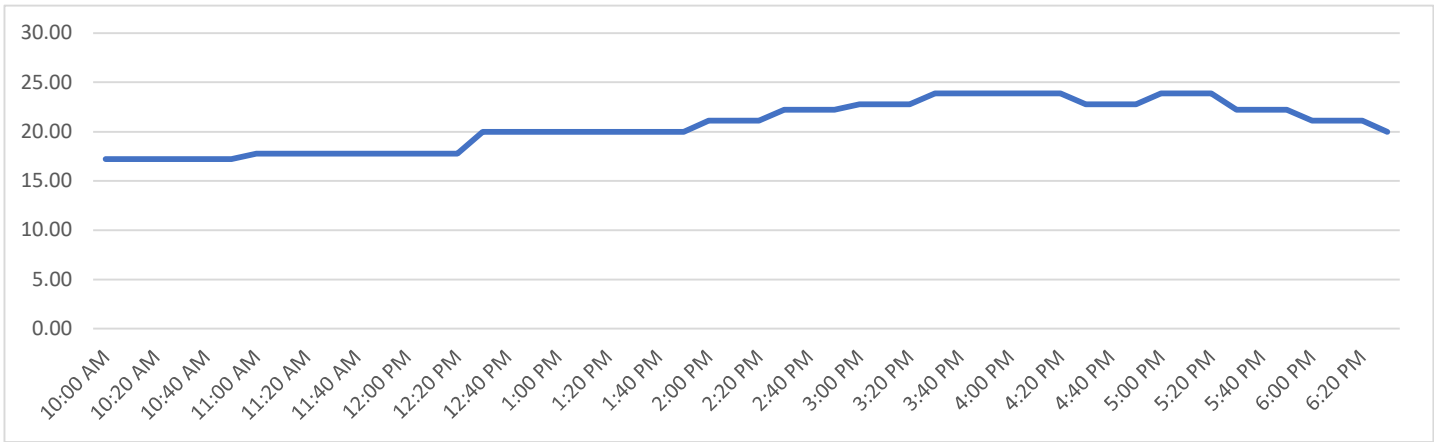

Supplement: s1 [file s1]

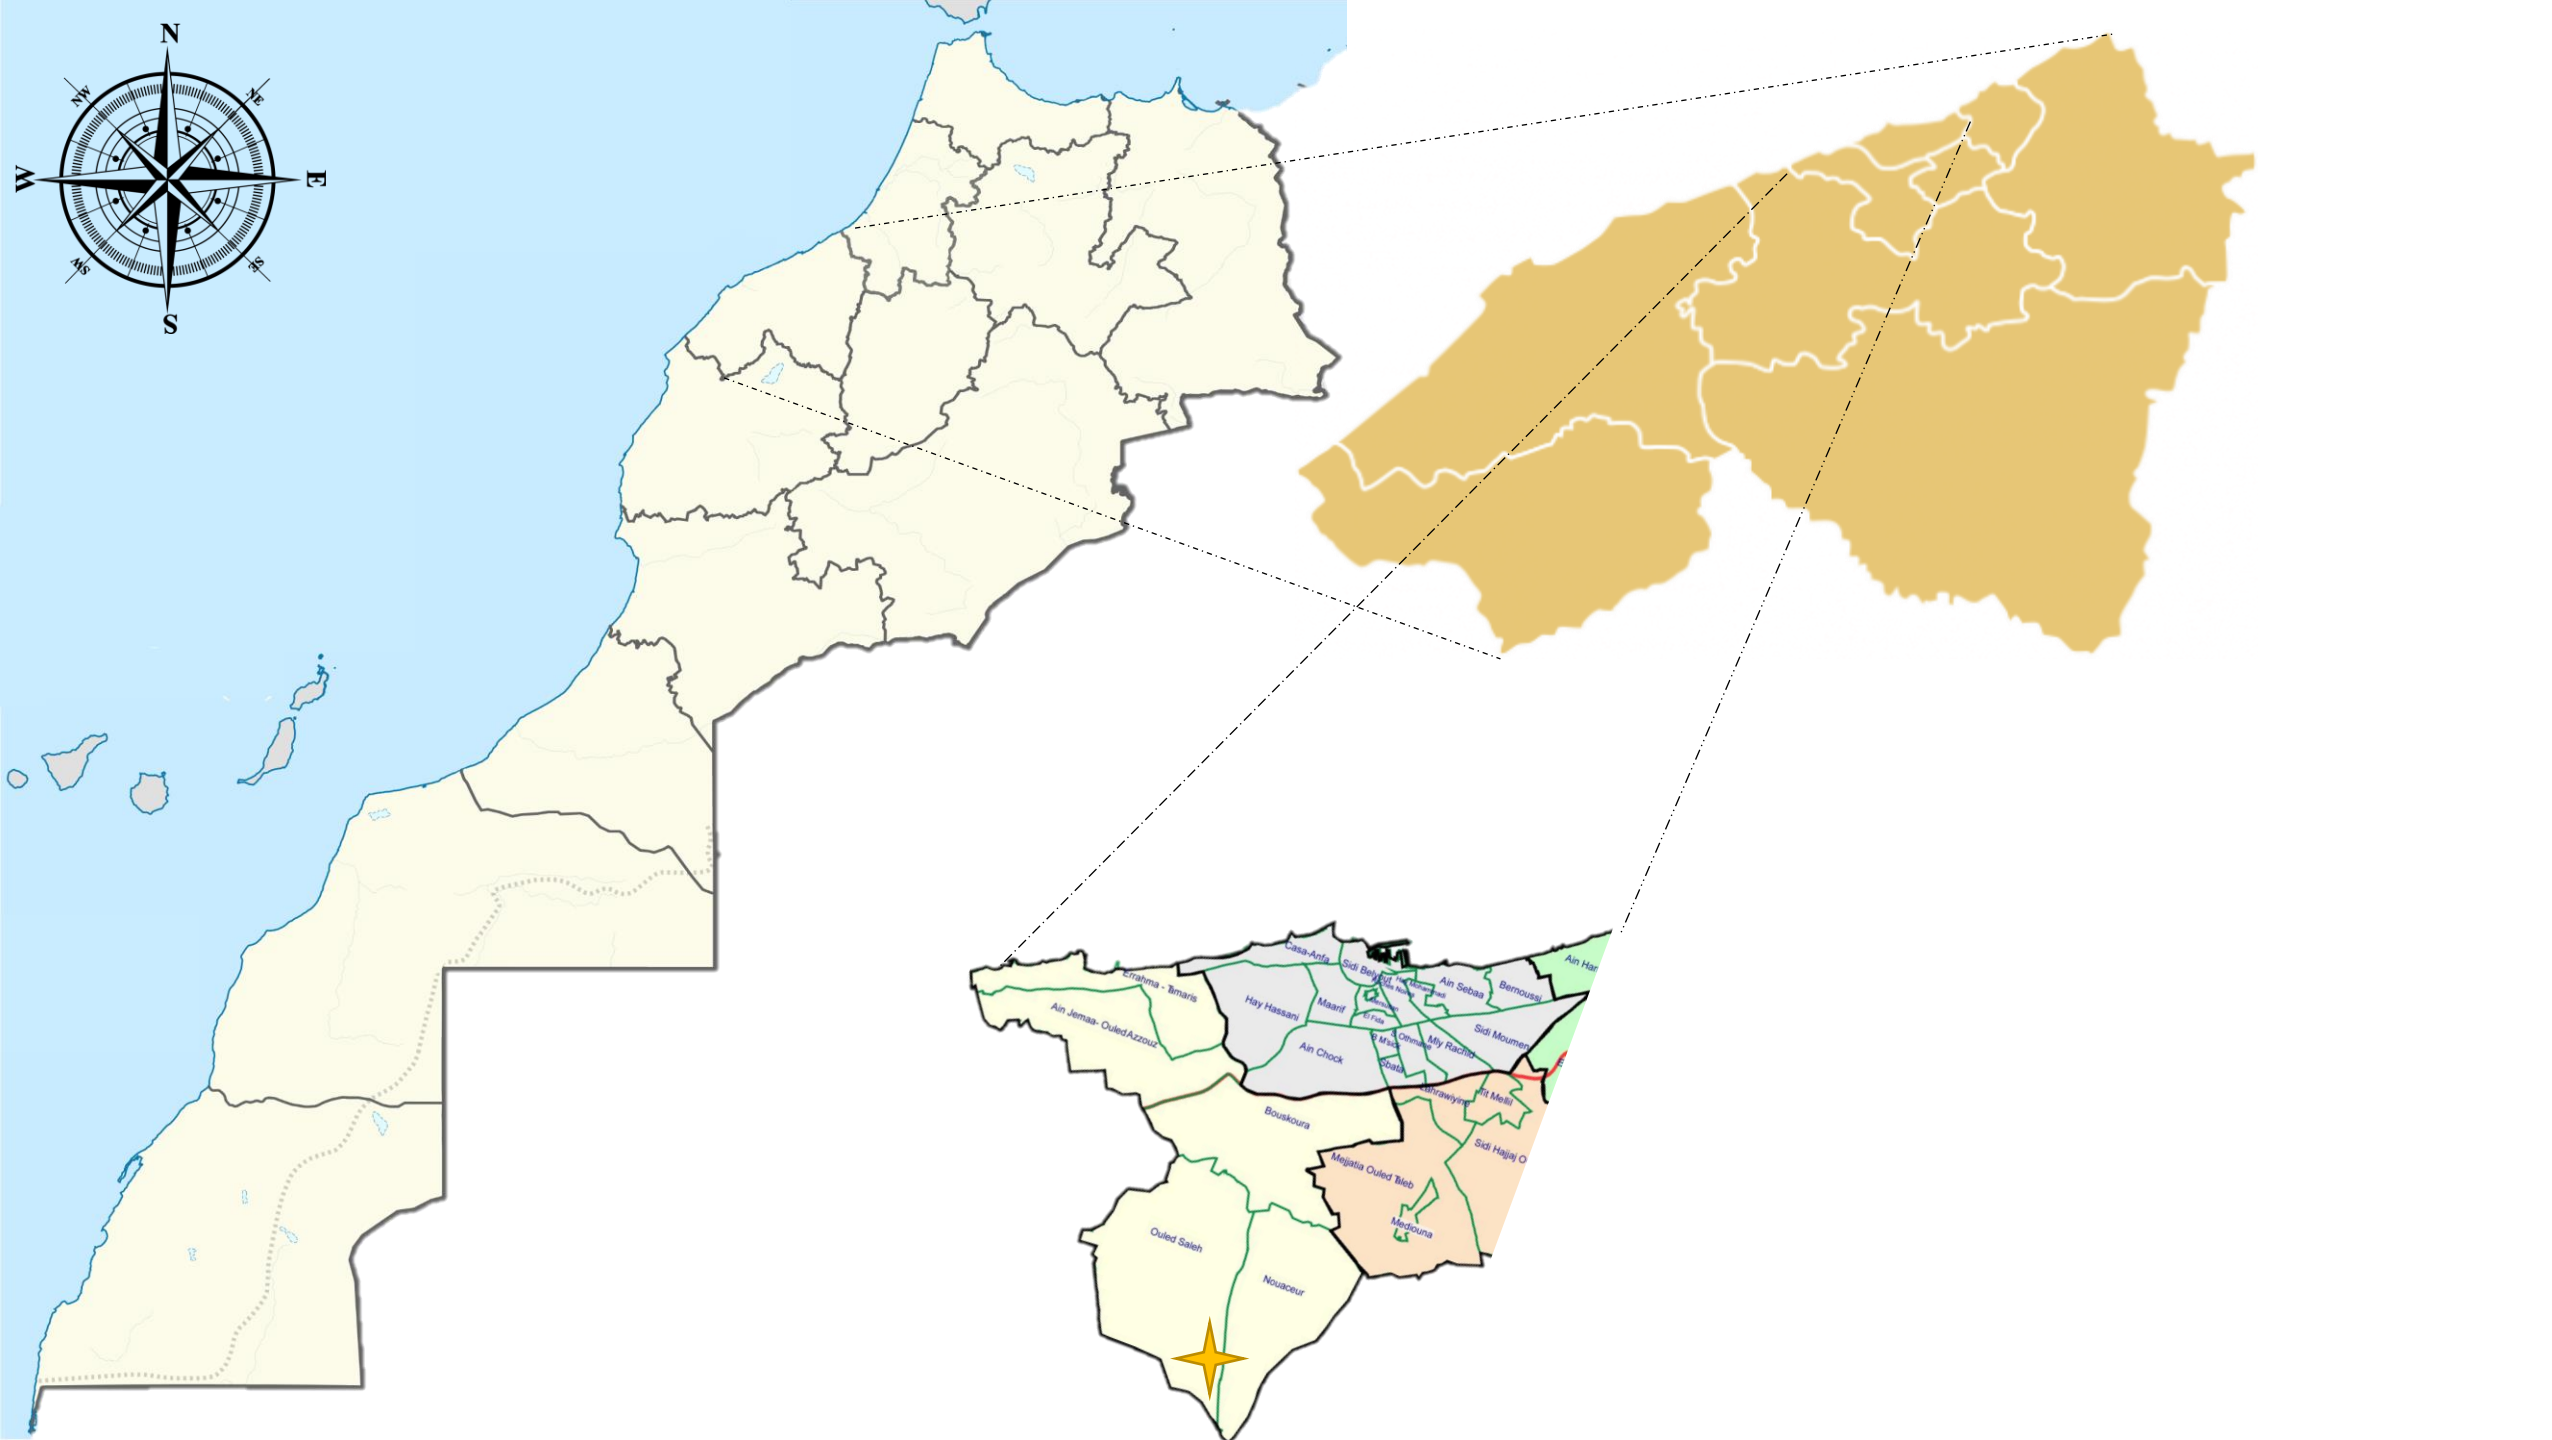

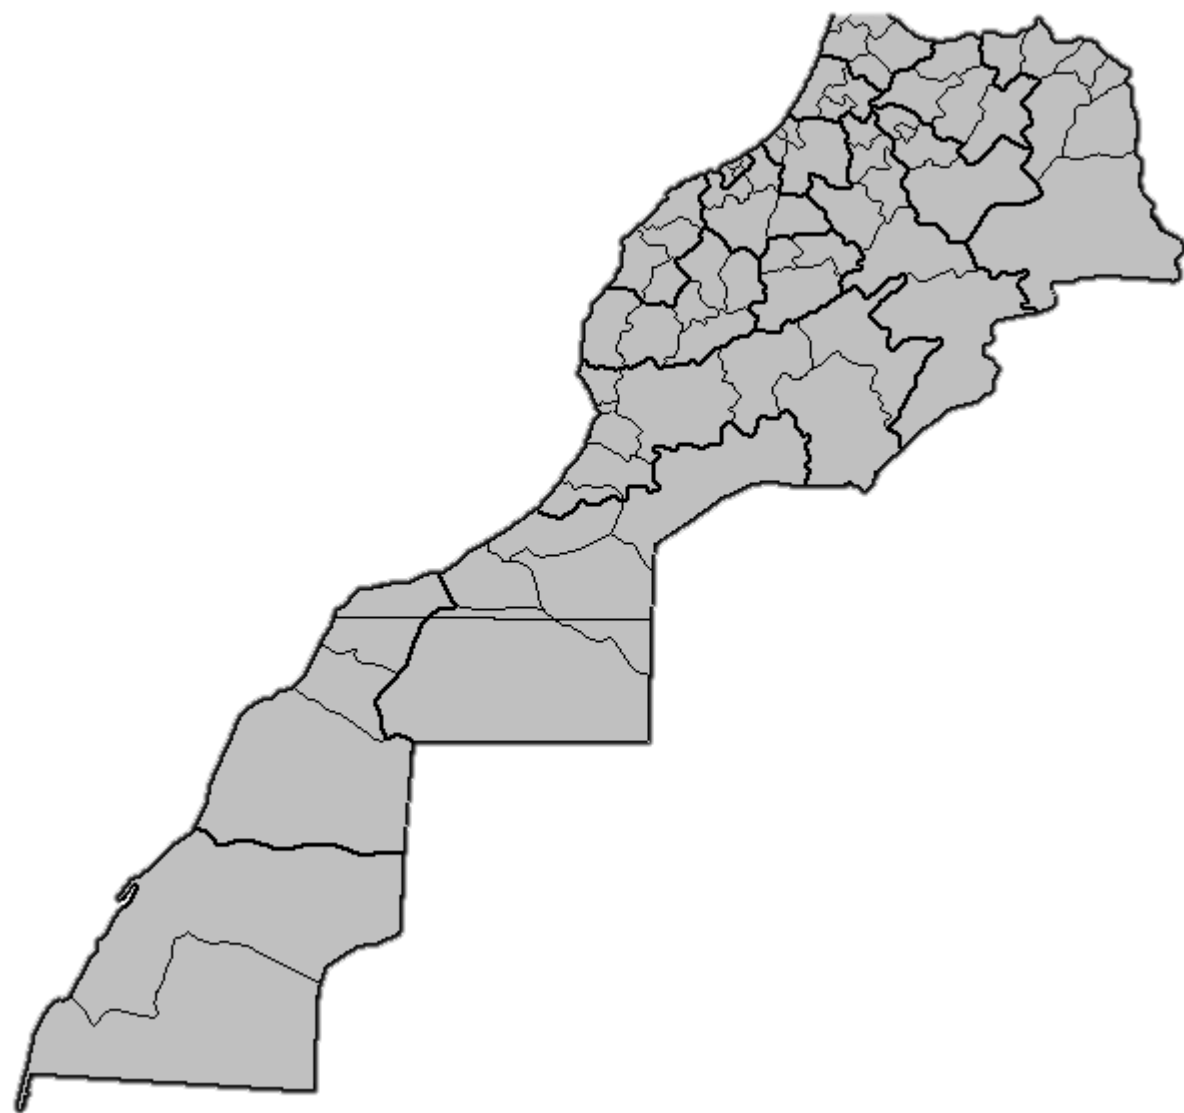

Supplement: s1 [file s1]

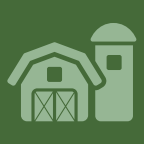

*agriculture*

Supplement: s1 [file s1]

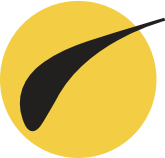

International Journal of

*Turbomachinery*

*Propulsion and Power*

Supplement: s1 [file s1]

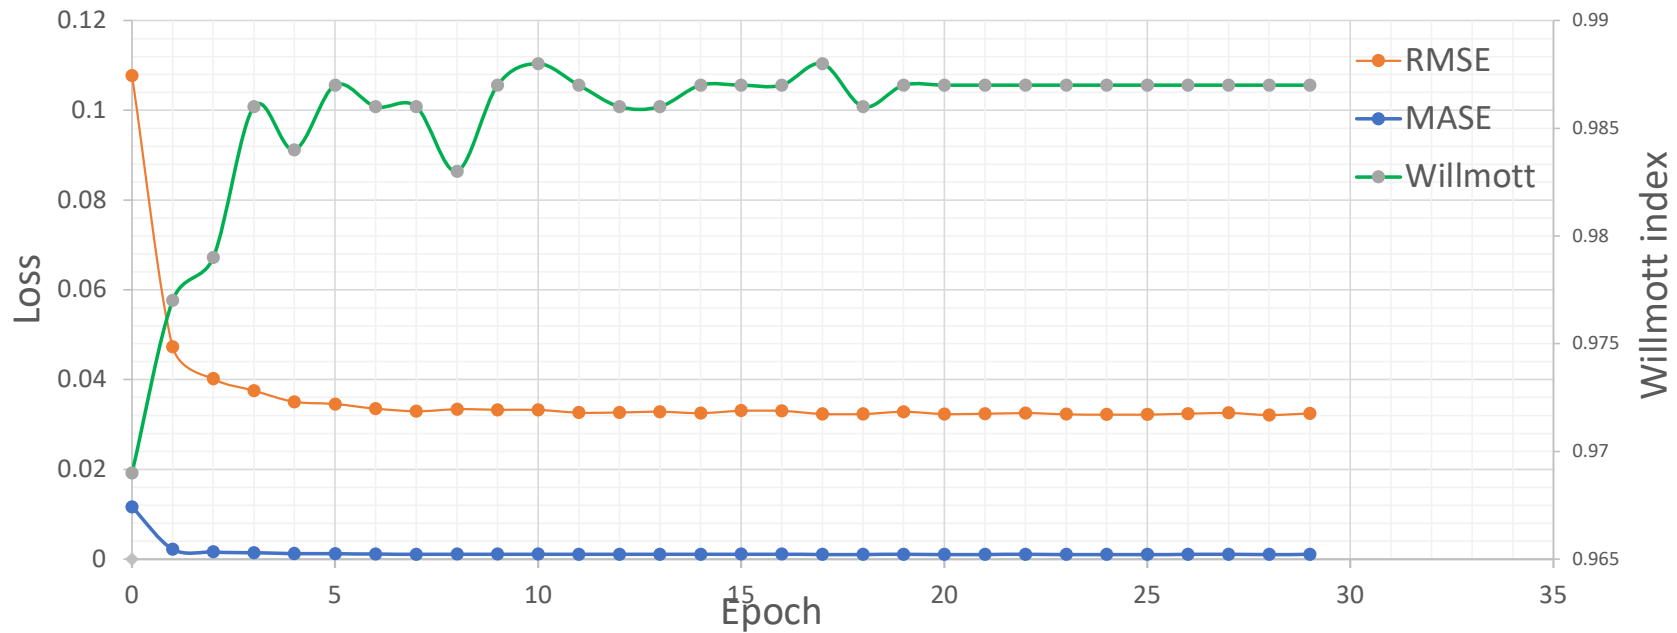

Supplement: s1 [file s1]

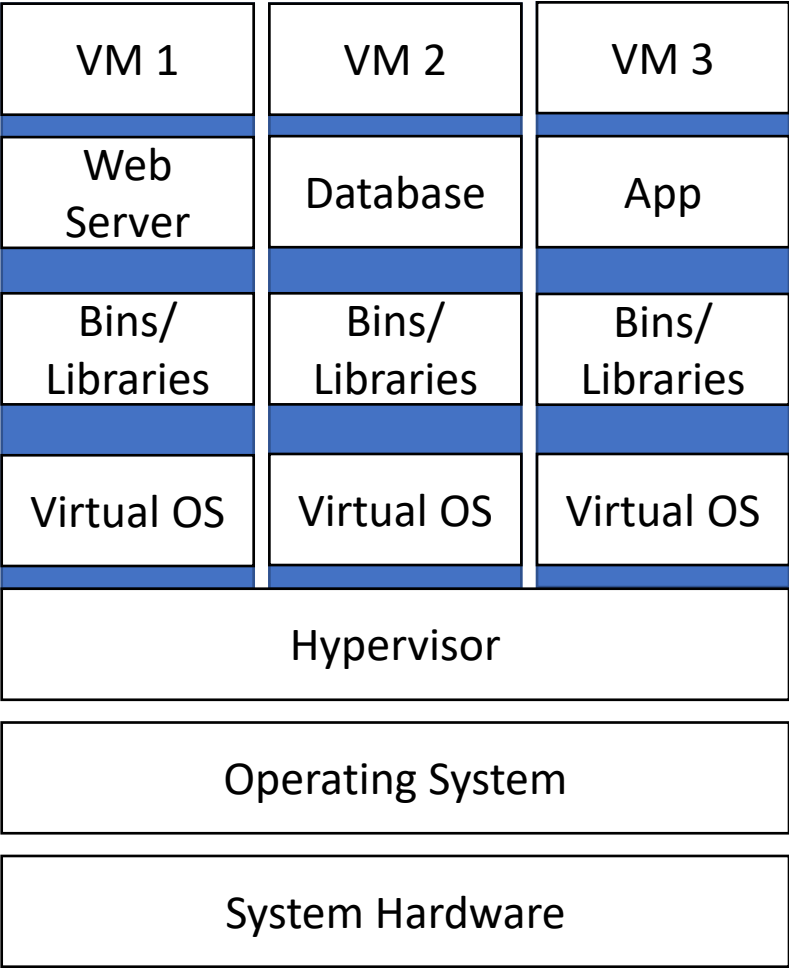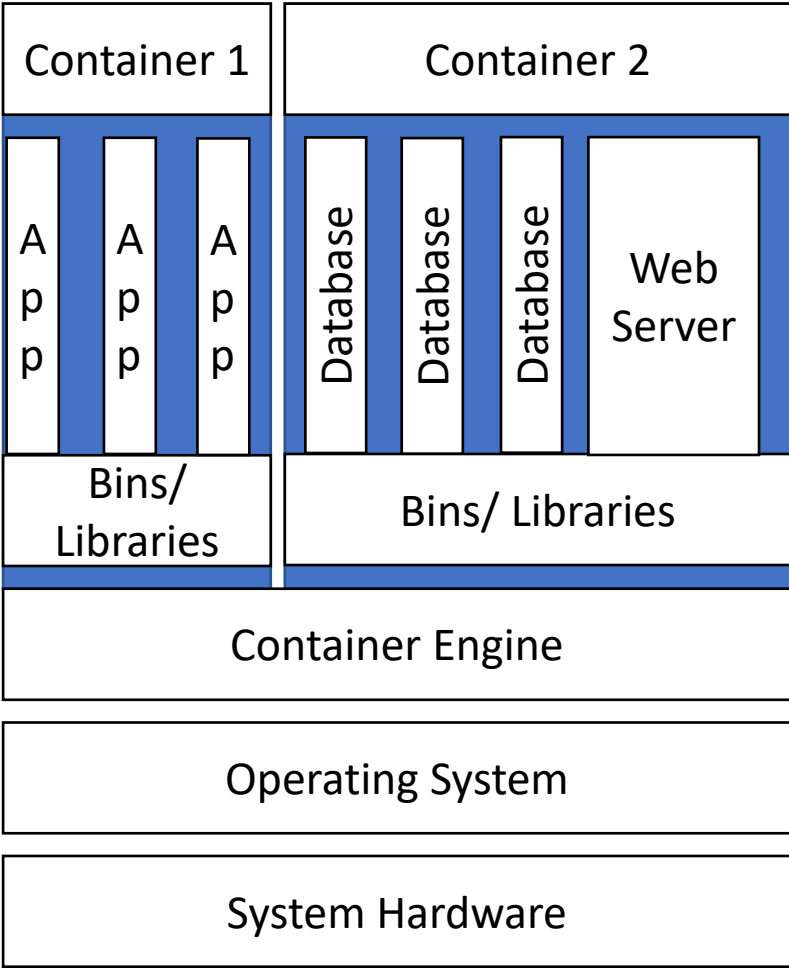

Supplement: s1 [file s1]

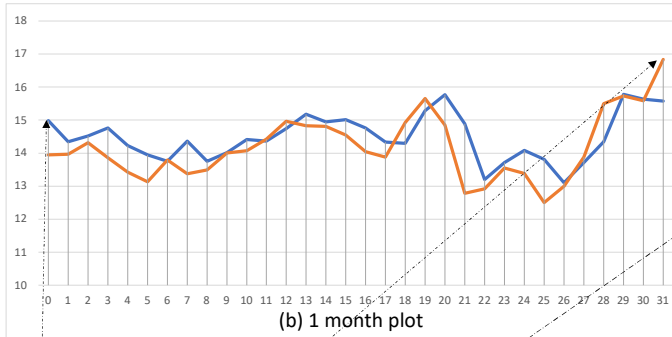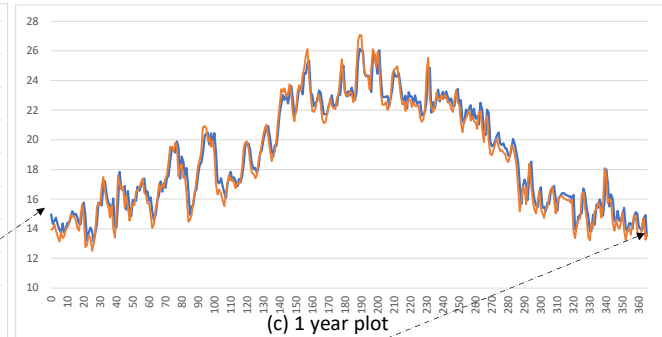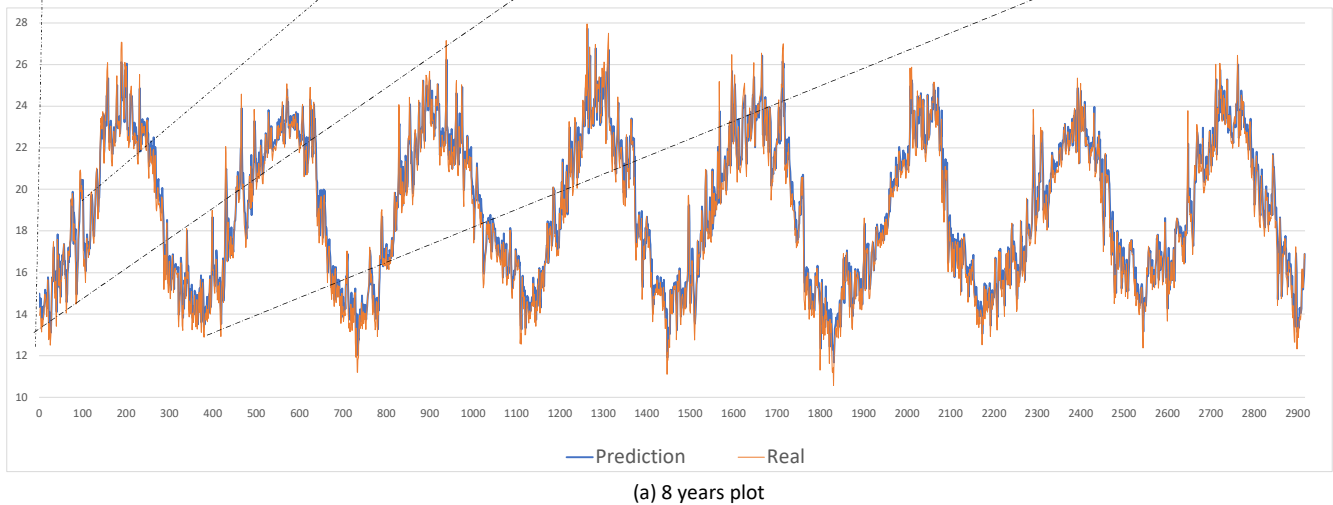

Supplement: s1 [file s1]

Prediction values

○ Model

— 1:1 Slope

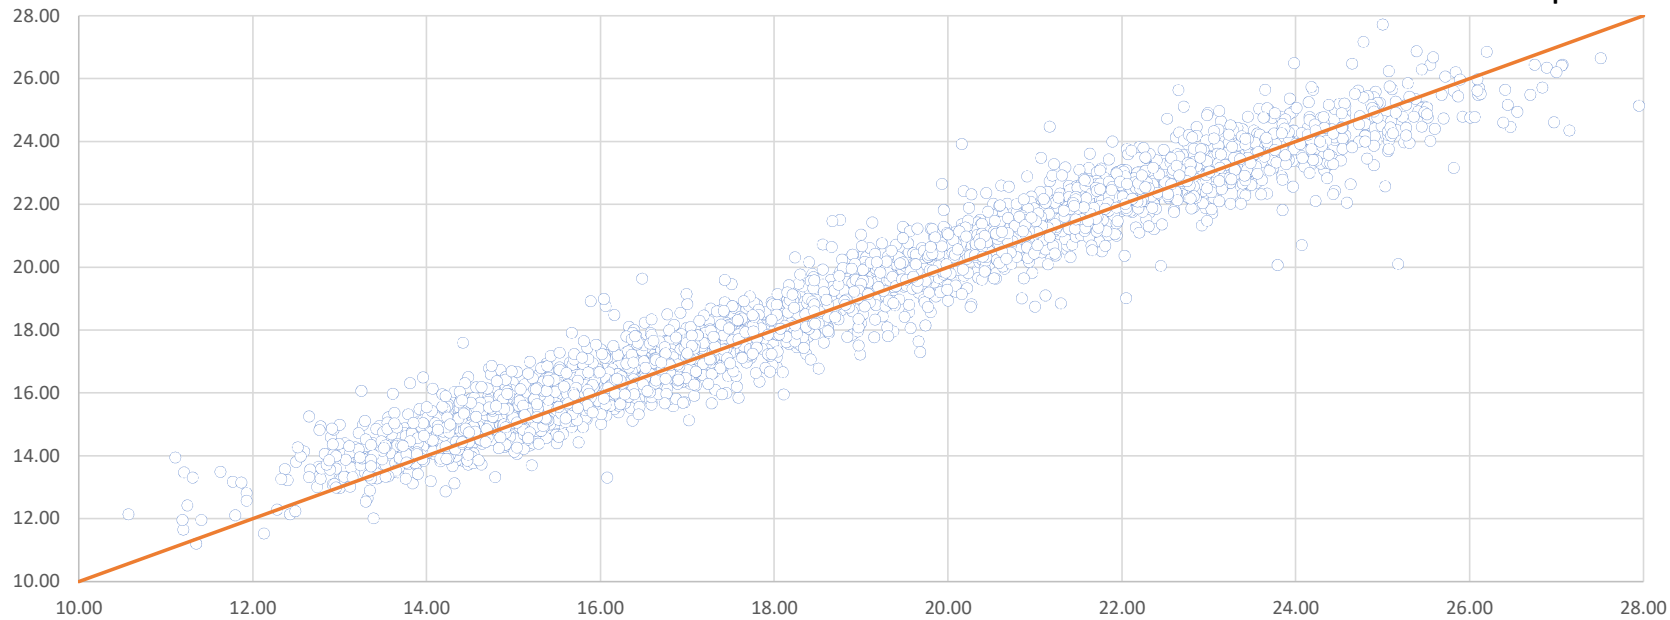

Real values

Supplement: s1 [file s1]

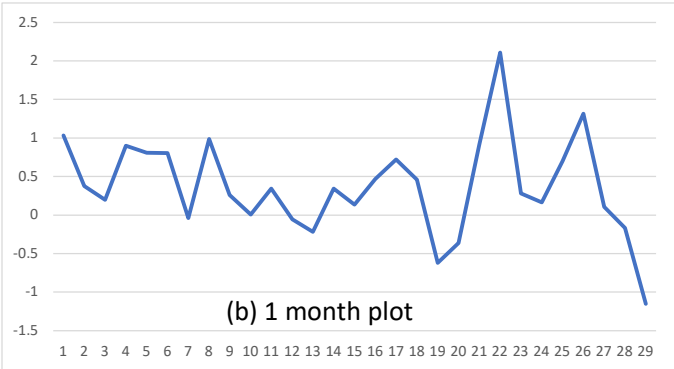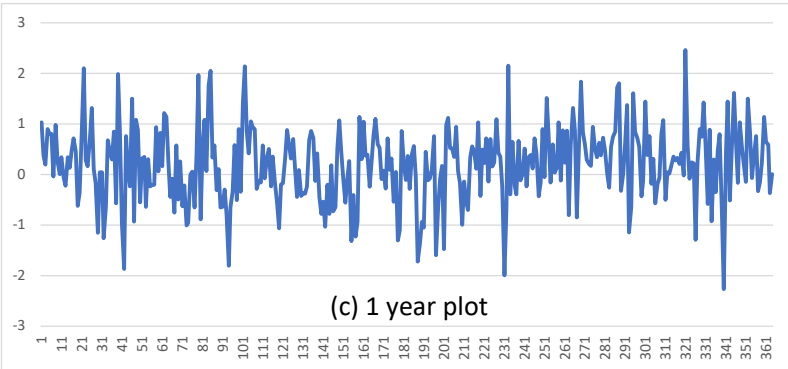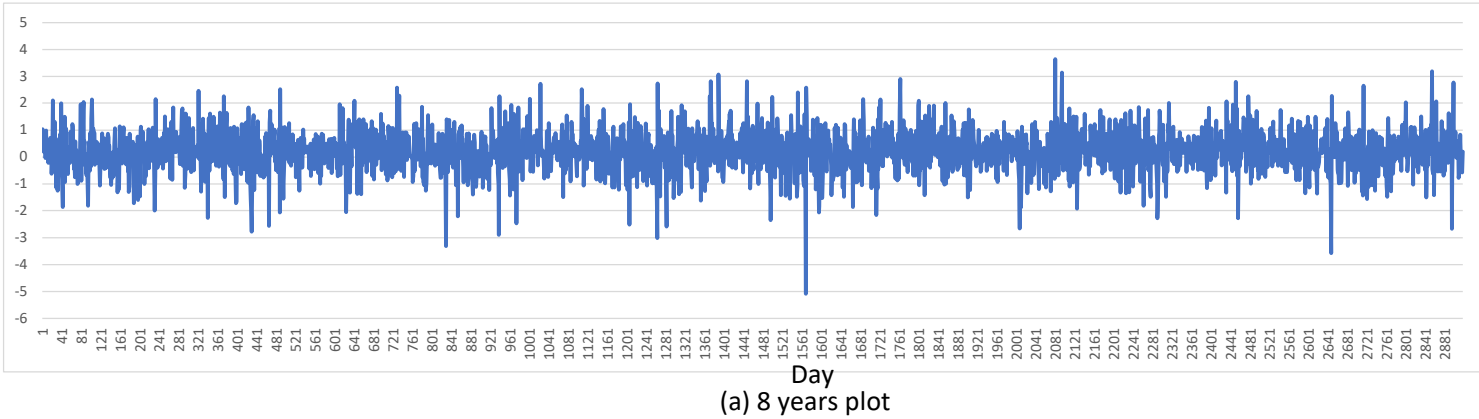

Supplement: s1 [file s1]

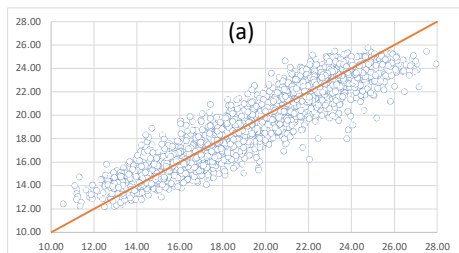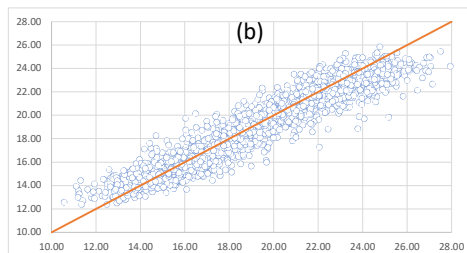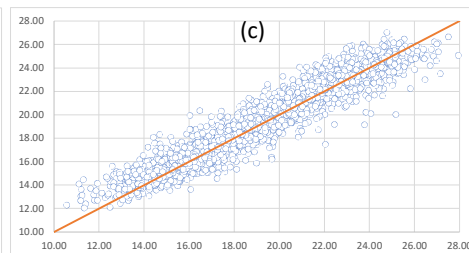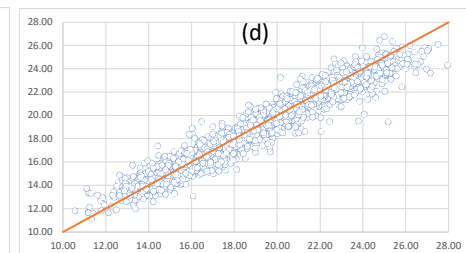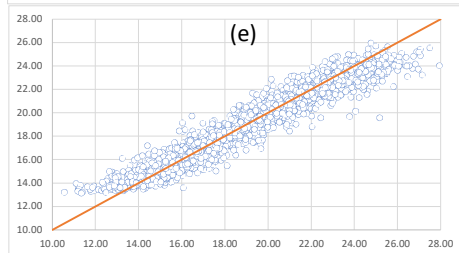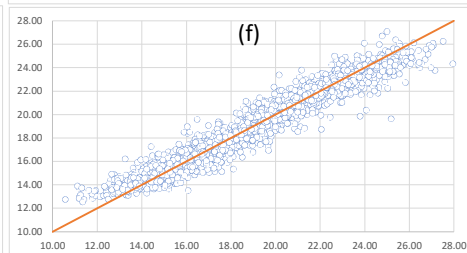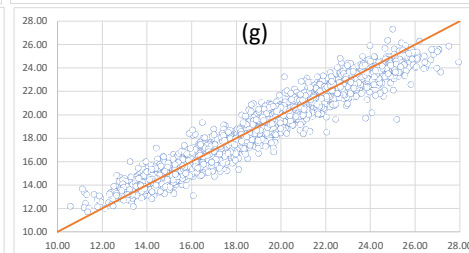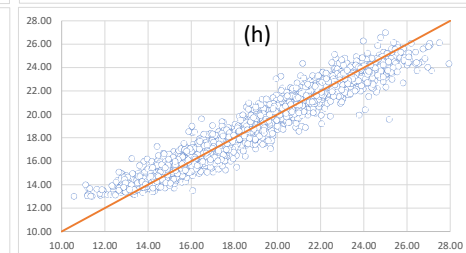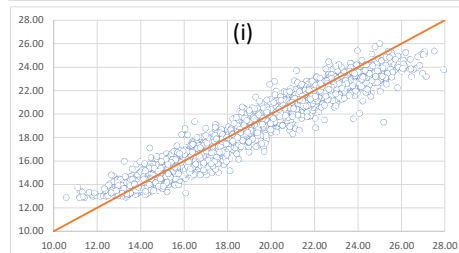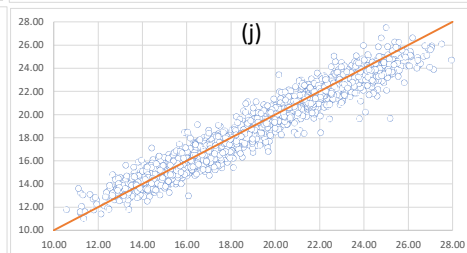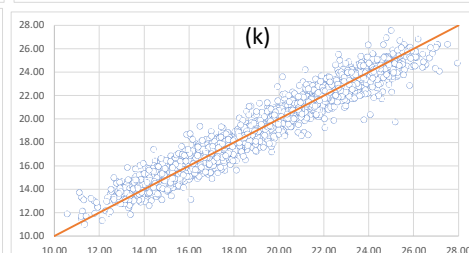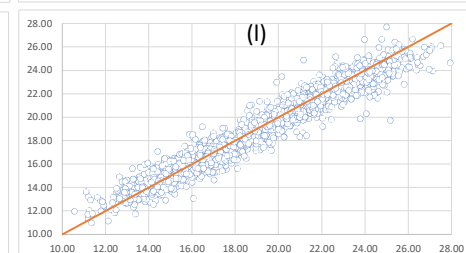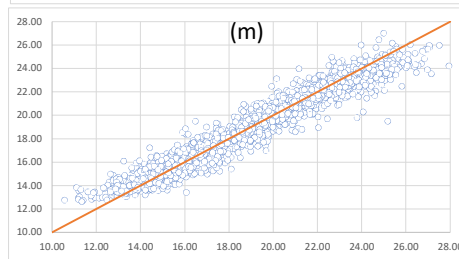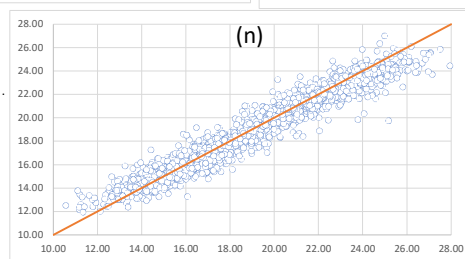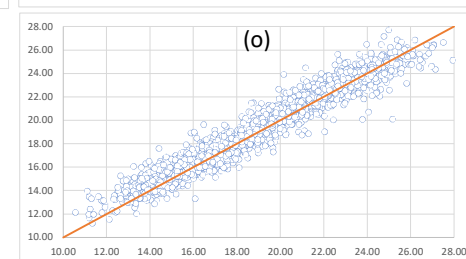

.....

.....

Real values

Prediction values

Supplement: s1 [file s1]

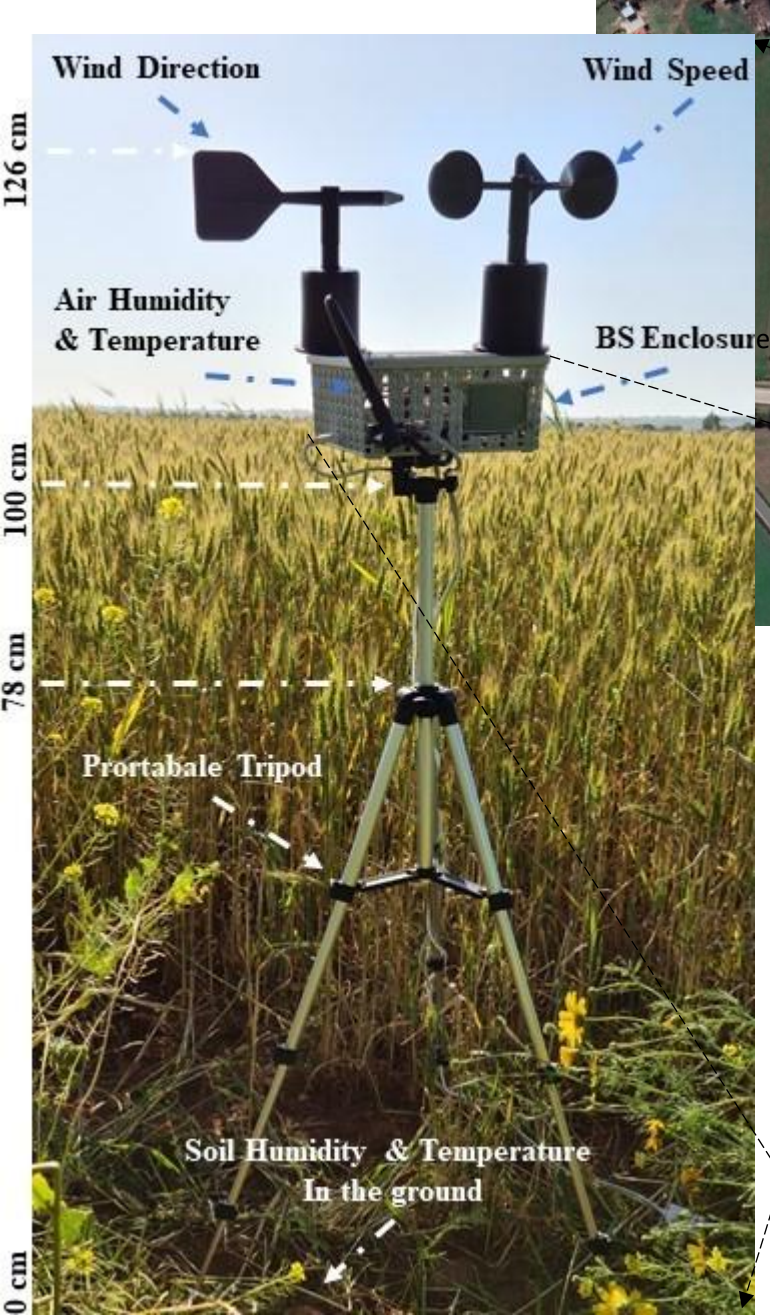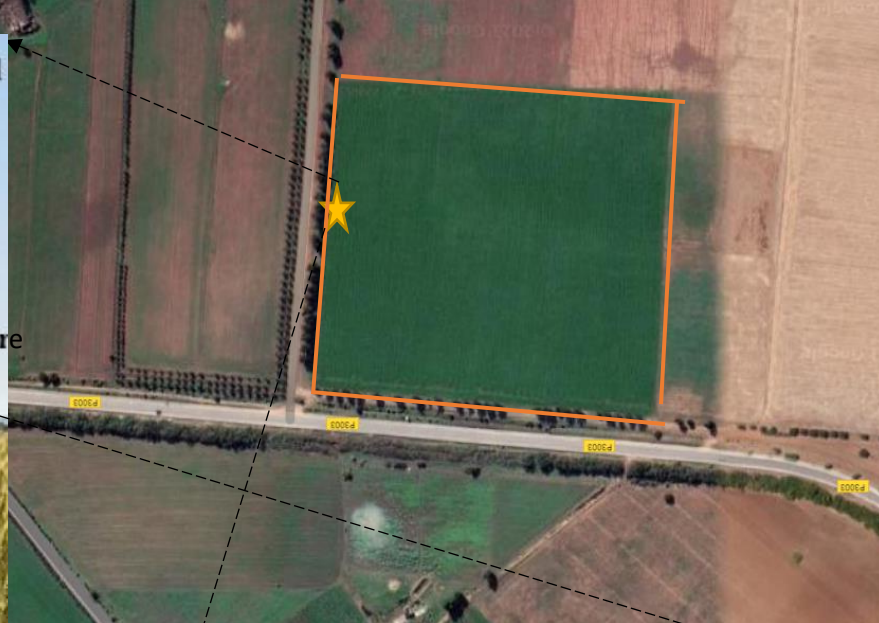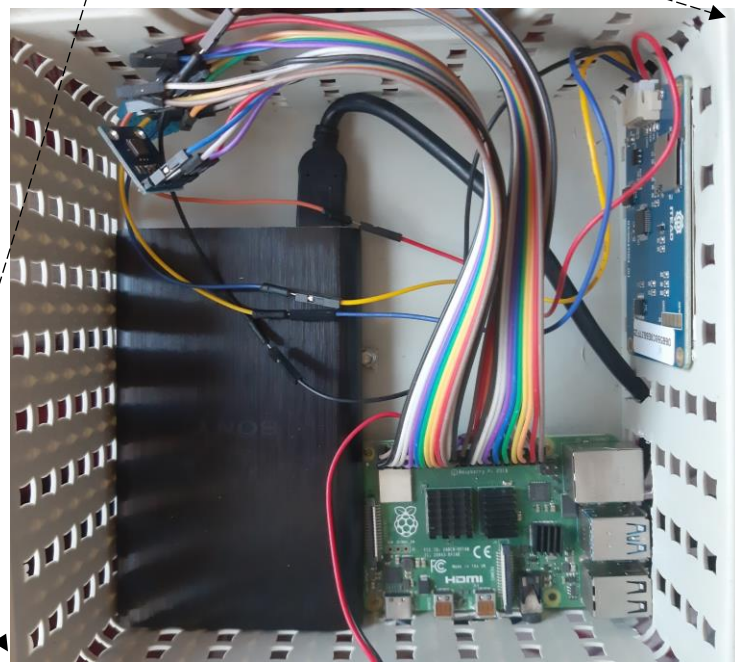

Supplement: s1 [file s1]

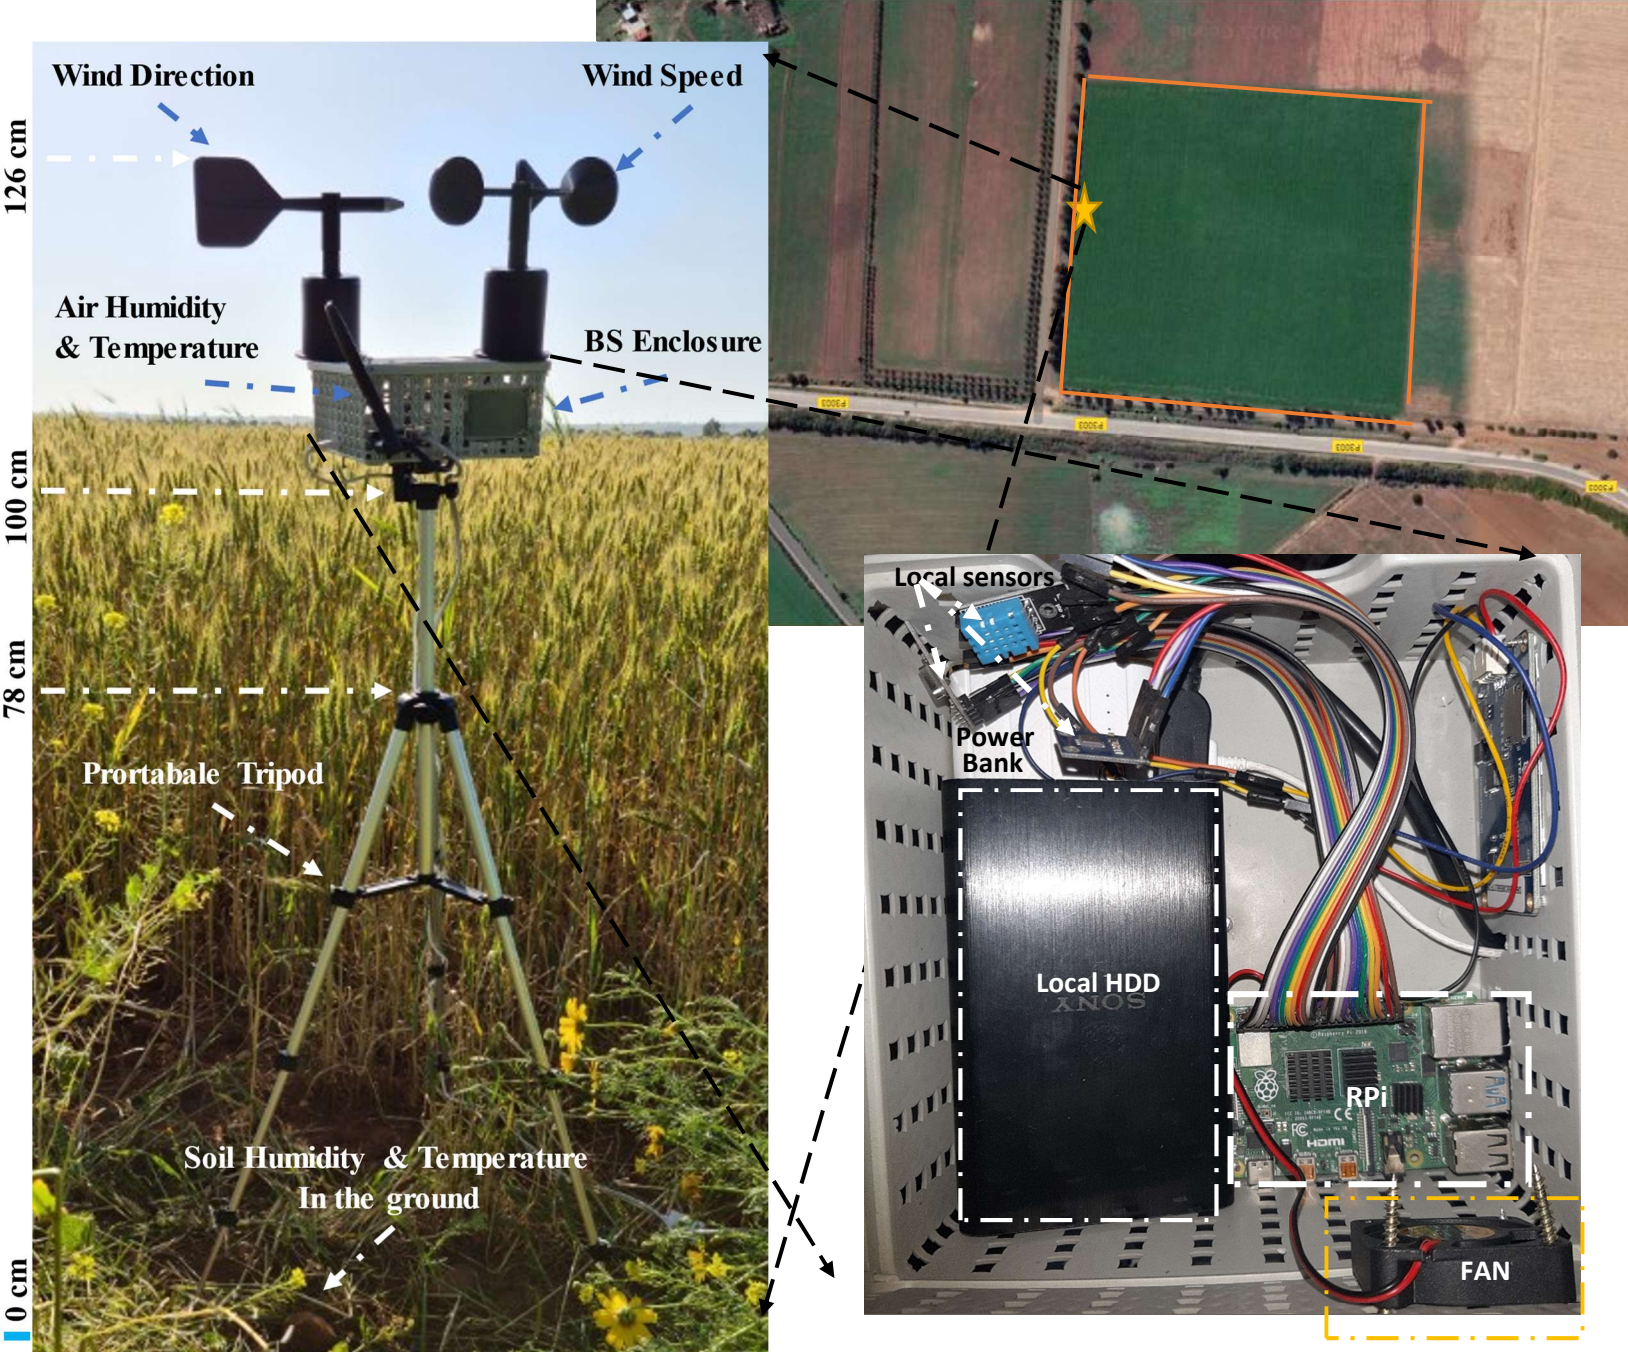

Supplement: s1 [file s1]

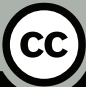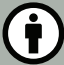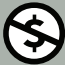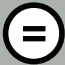

BY

NC

ND

Supplement: s1 [file s1]

Number of records

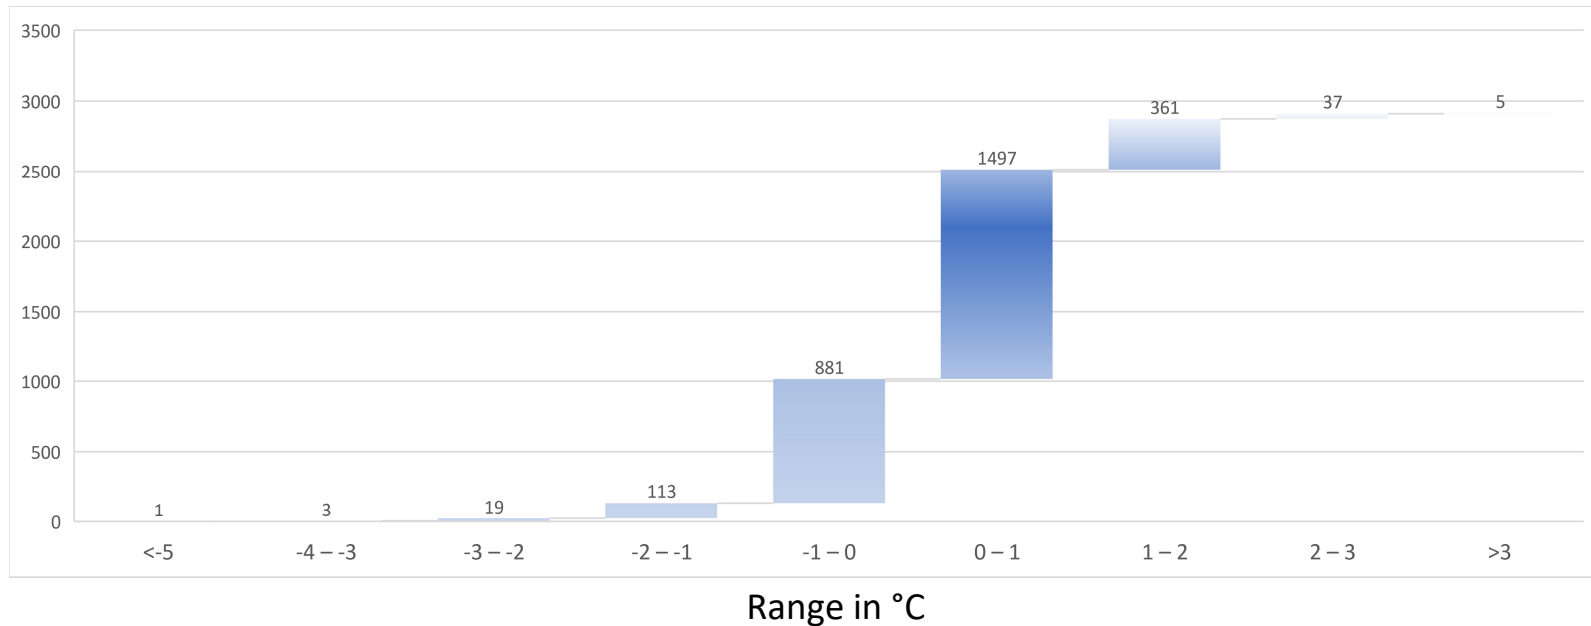

Supplement: s1 [file s1]

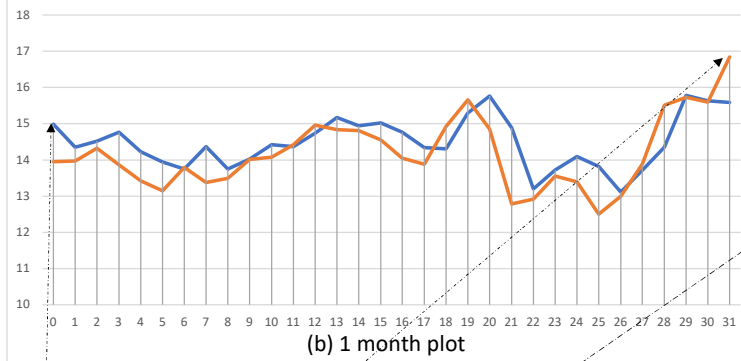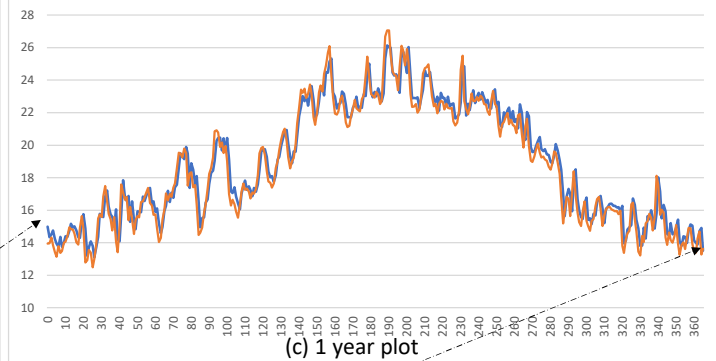

Temperature

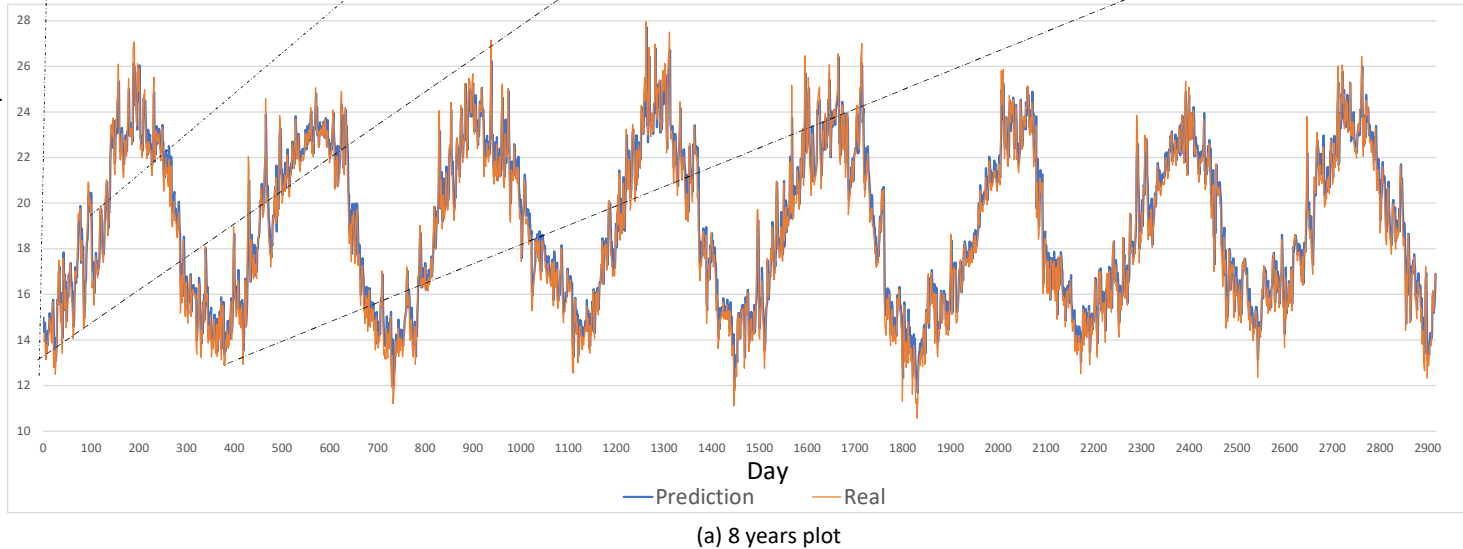

Supplement: s1 [file s1]

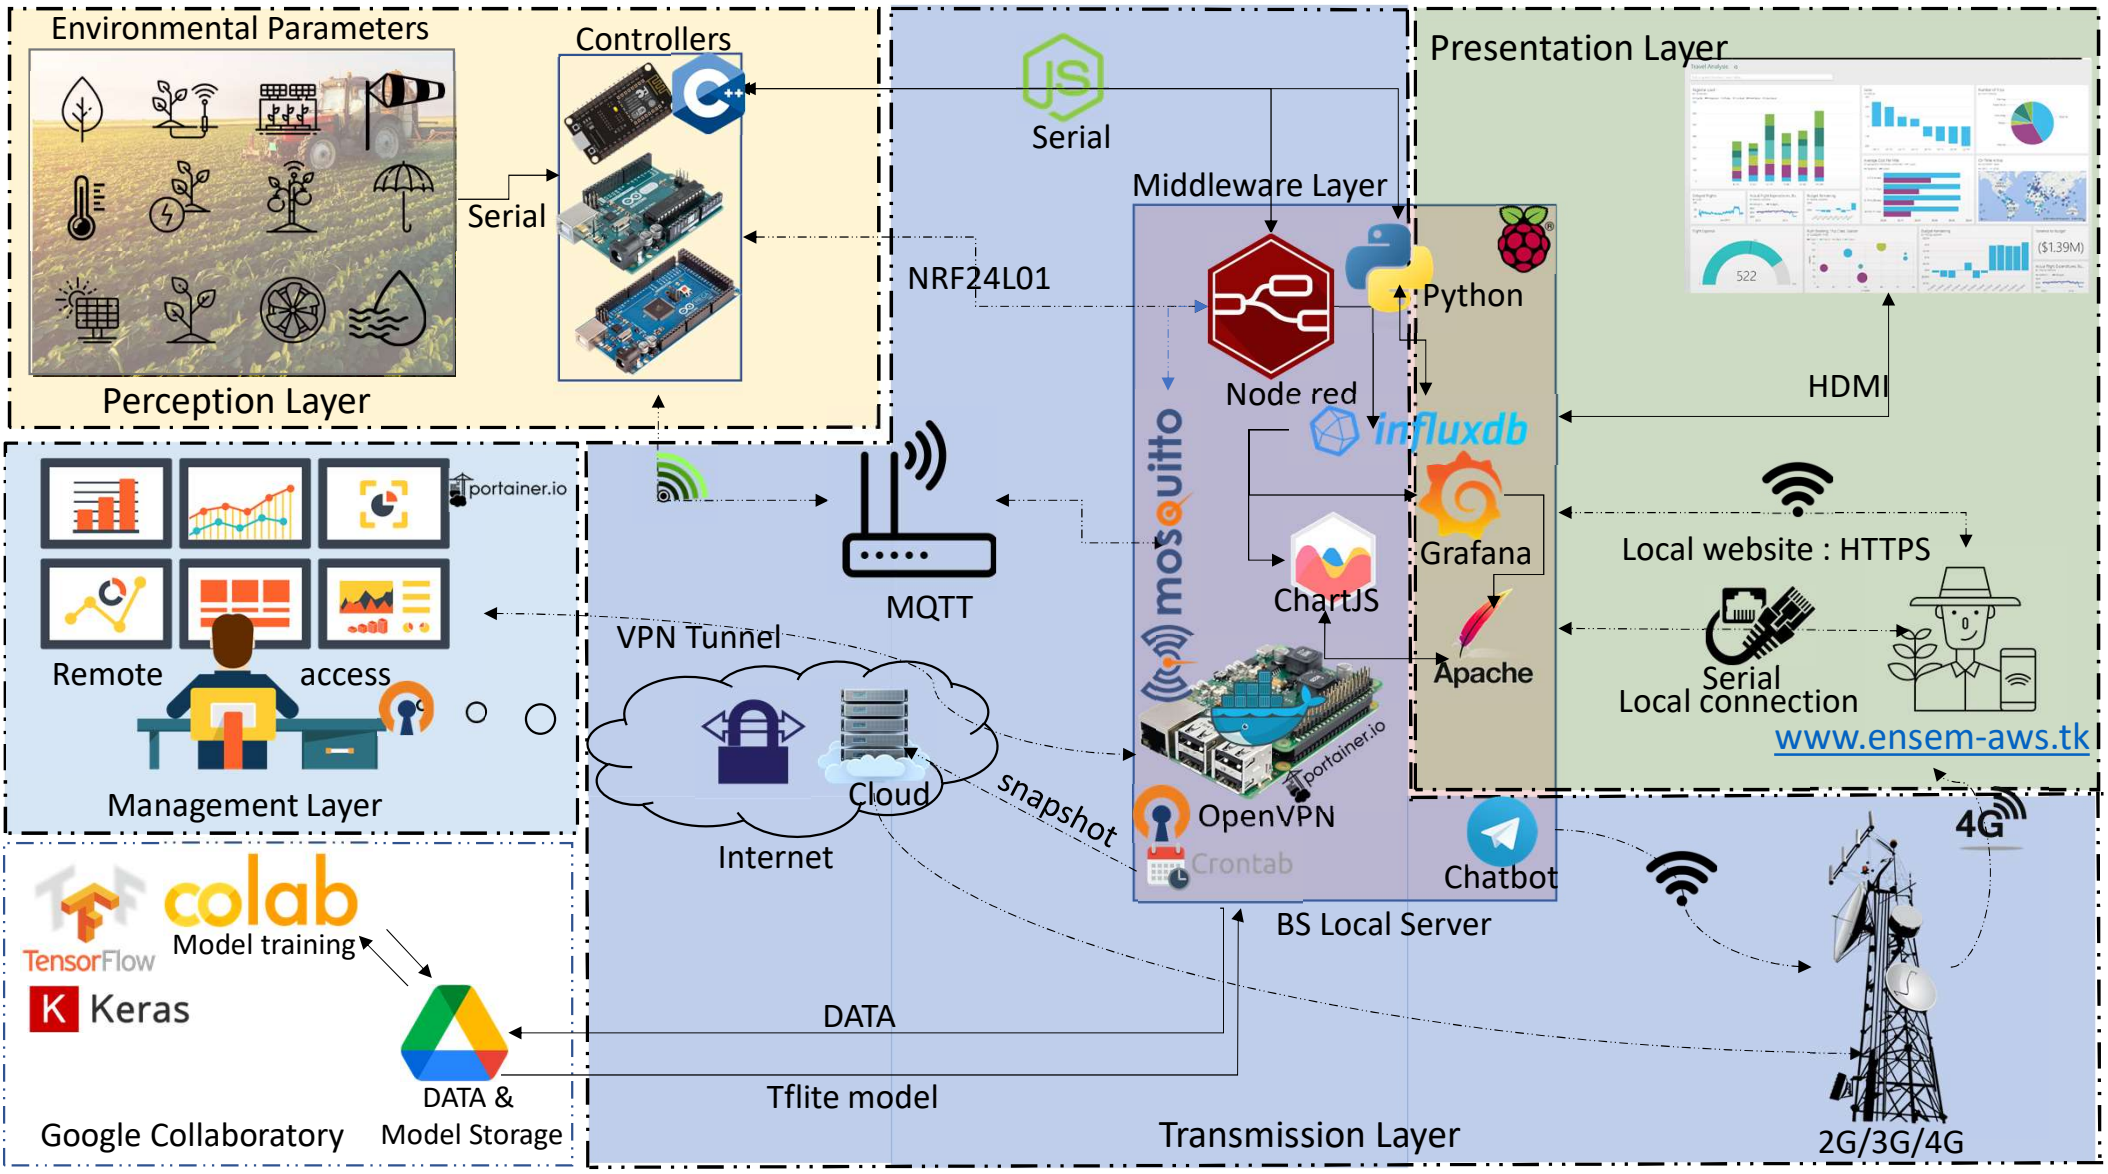

Supplement: s1 [file s1]

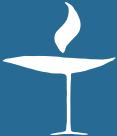

*religions*

Supplement: s1 [file s1]

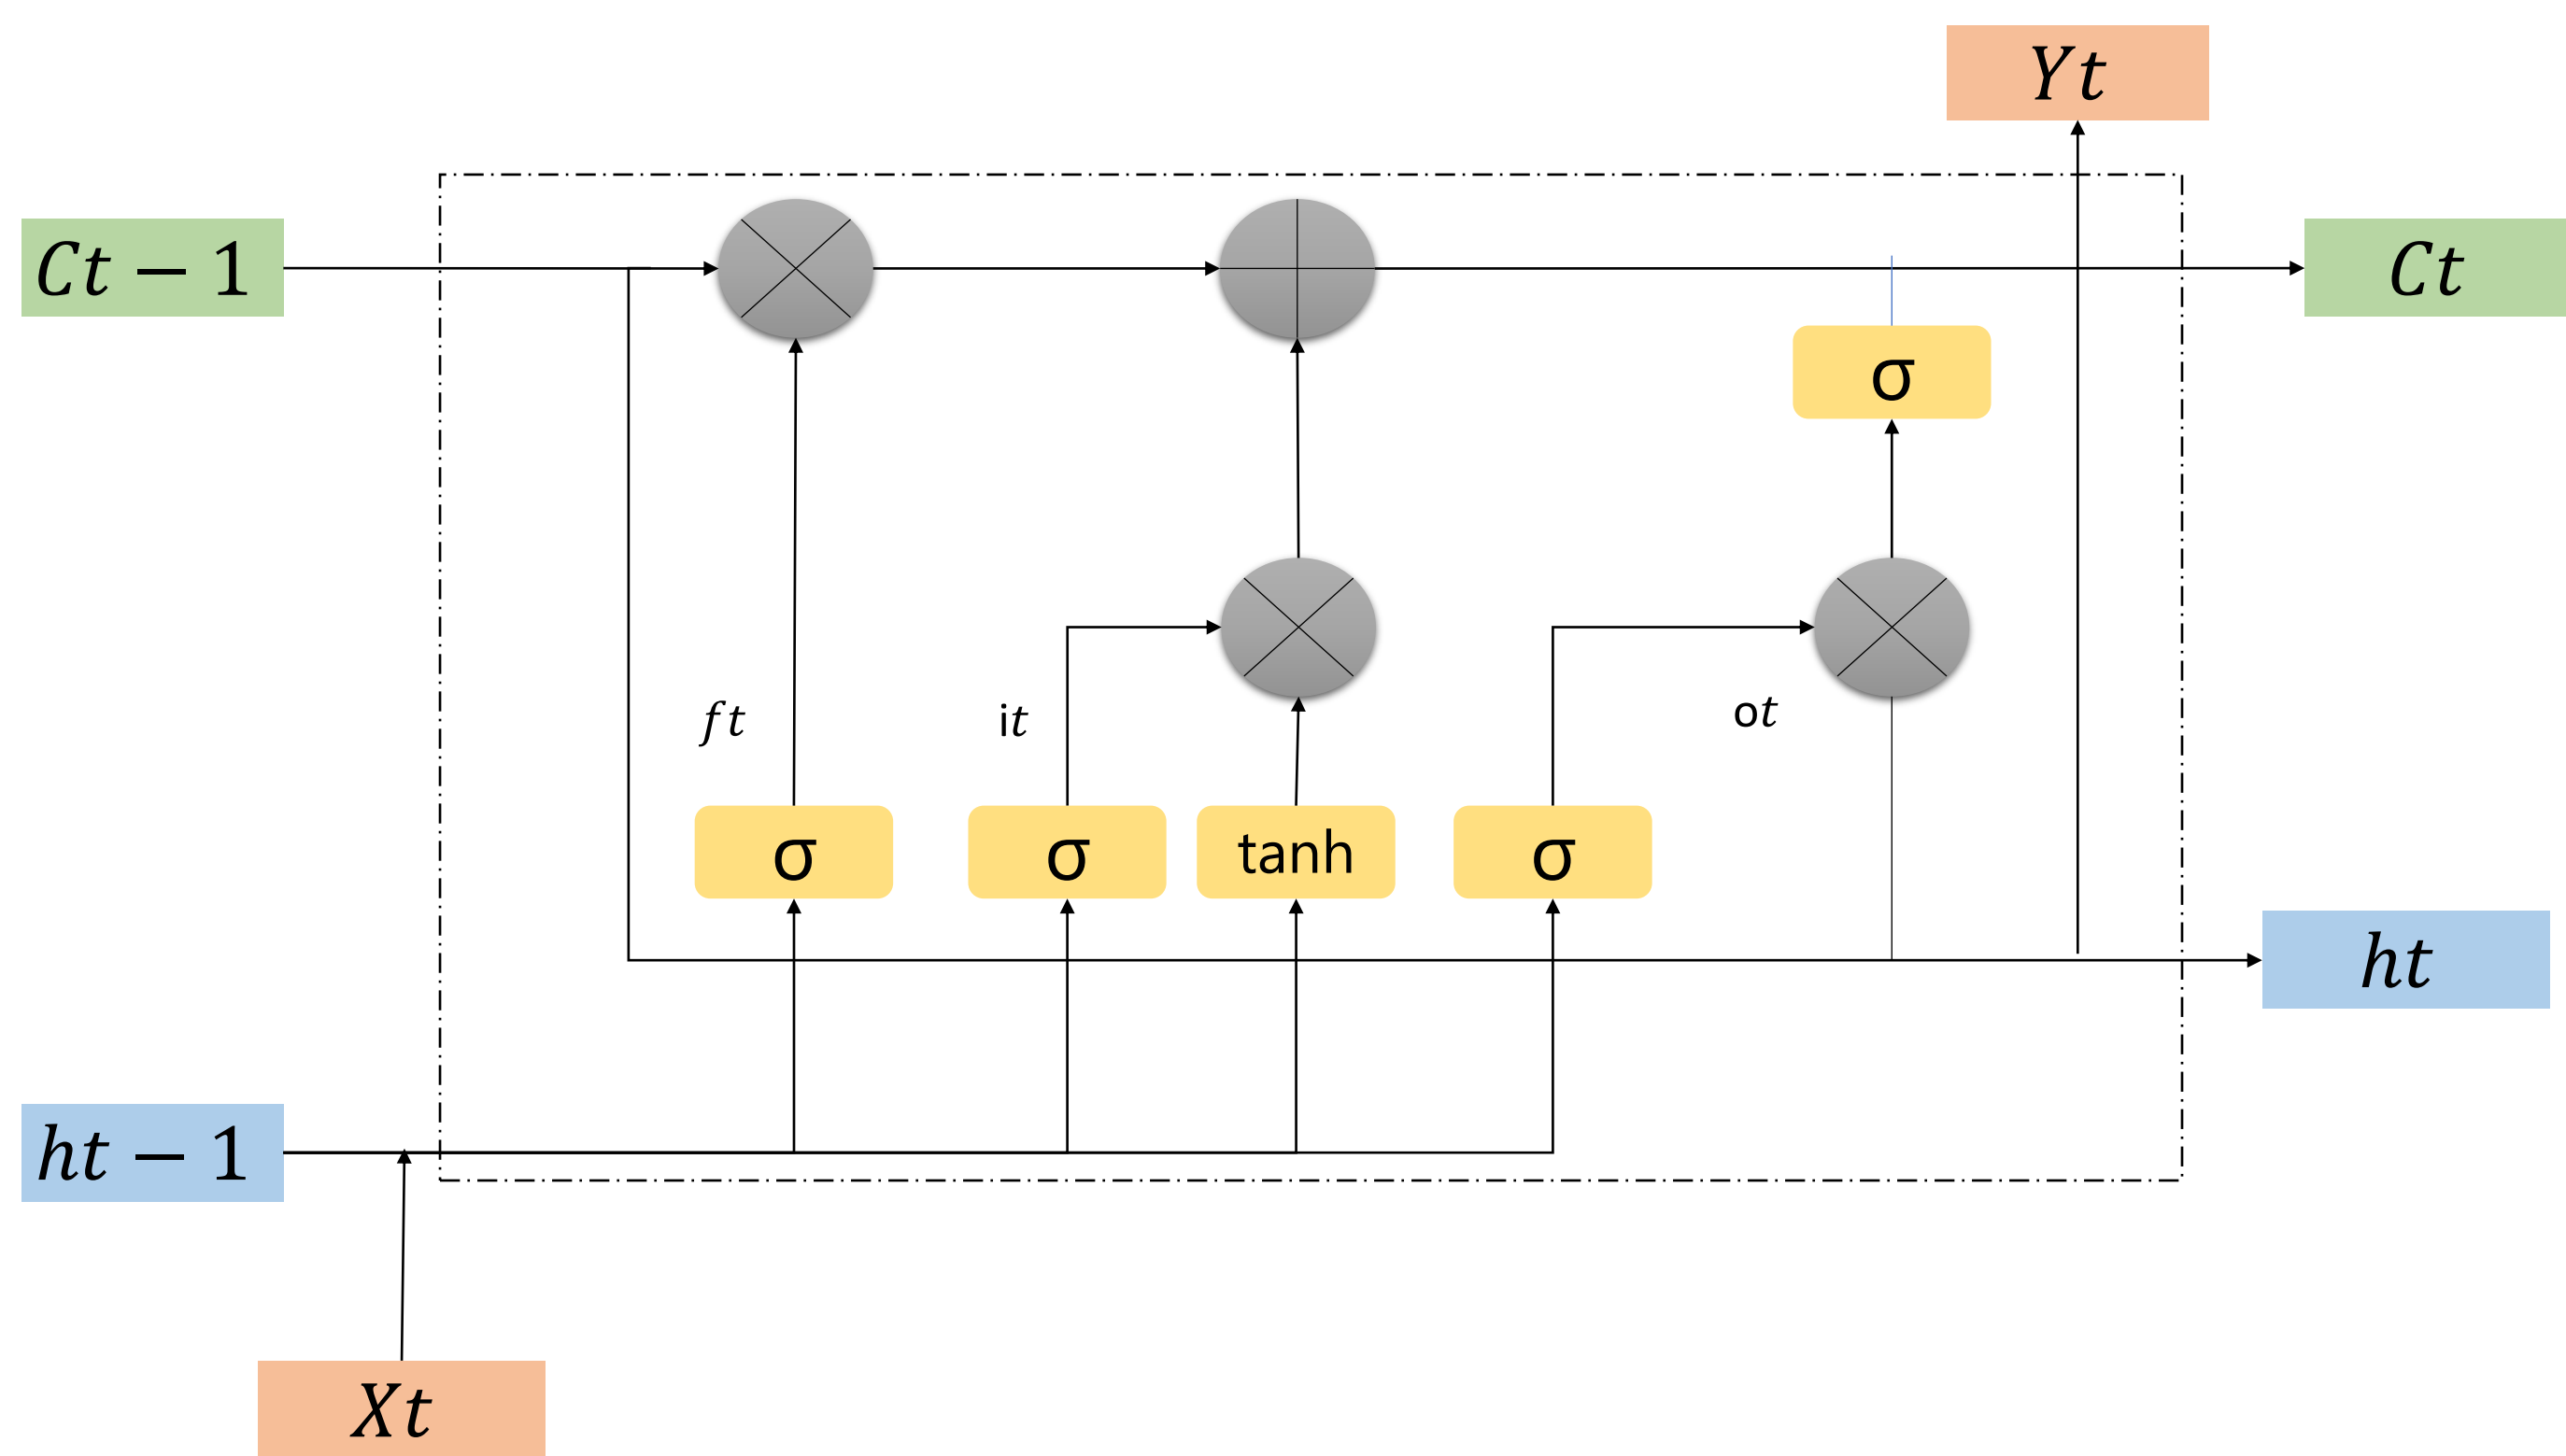

Supplement: s1 [file s1]

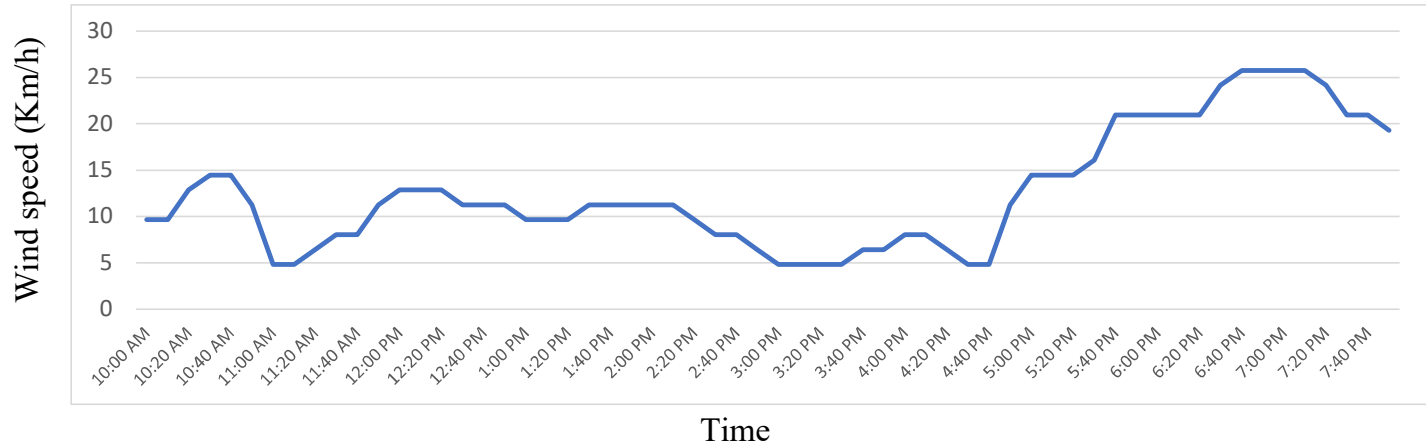

Supplement: s1 [file s1]

Temperature (°C)

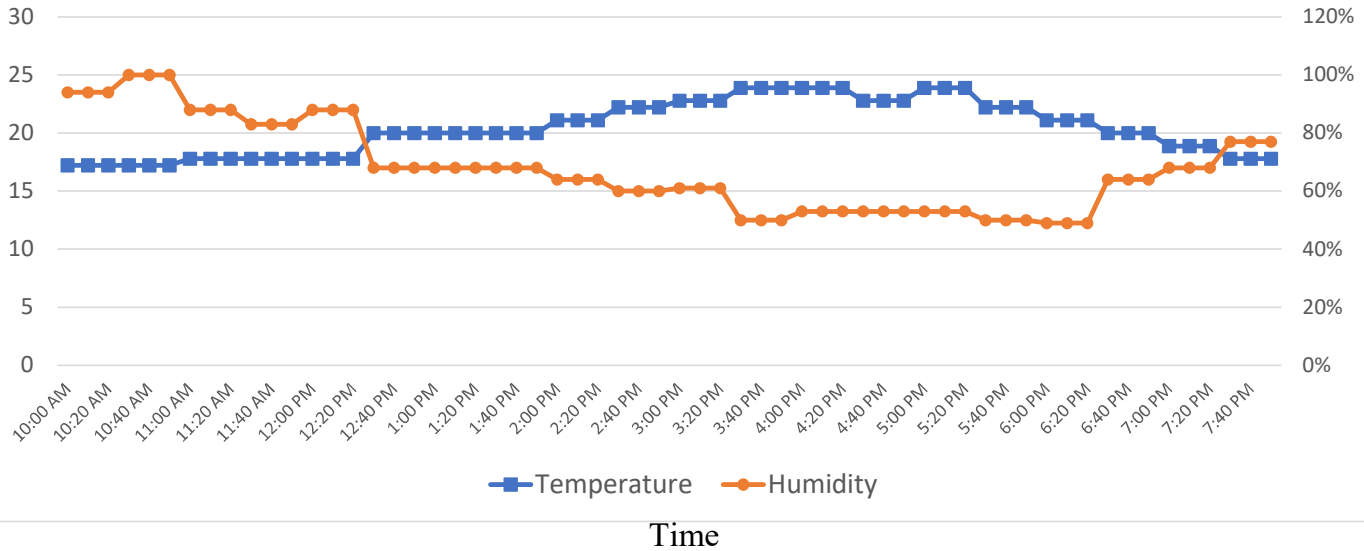

Humidity (%)

Supplement: s1 [file s1]

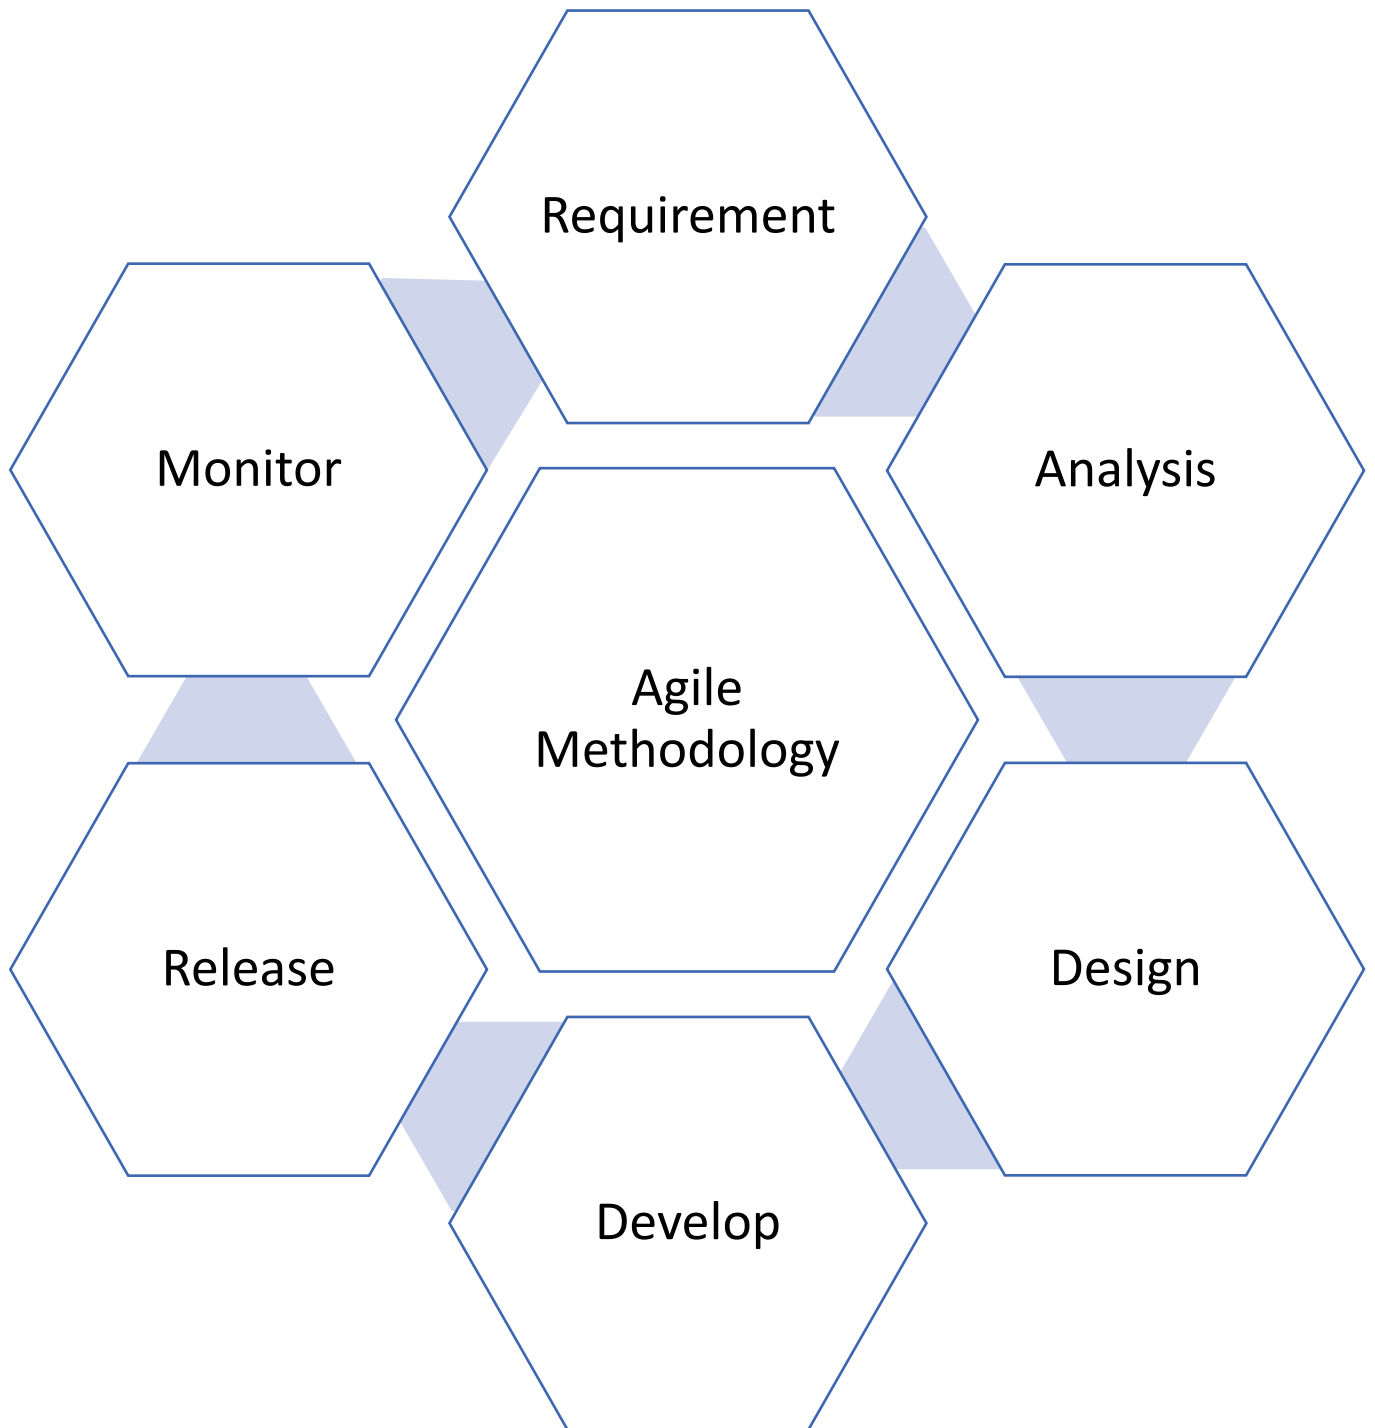

Supplement: s1 [file s1]

■ 4 – 8 km/h ■ 8 – 12 km/h ■ 12 – 16 km/h ■ 20 – 24 km/h

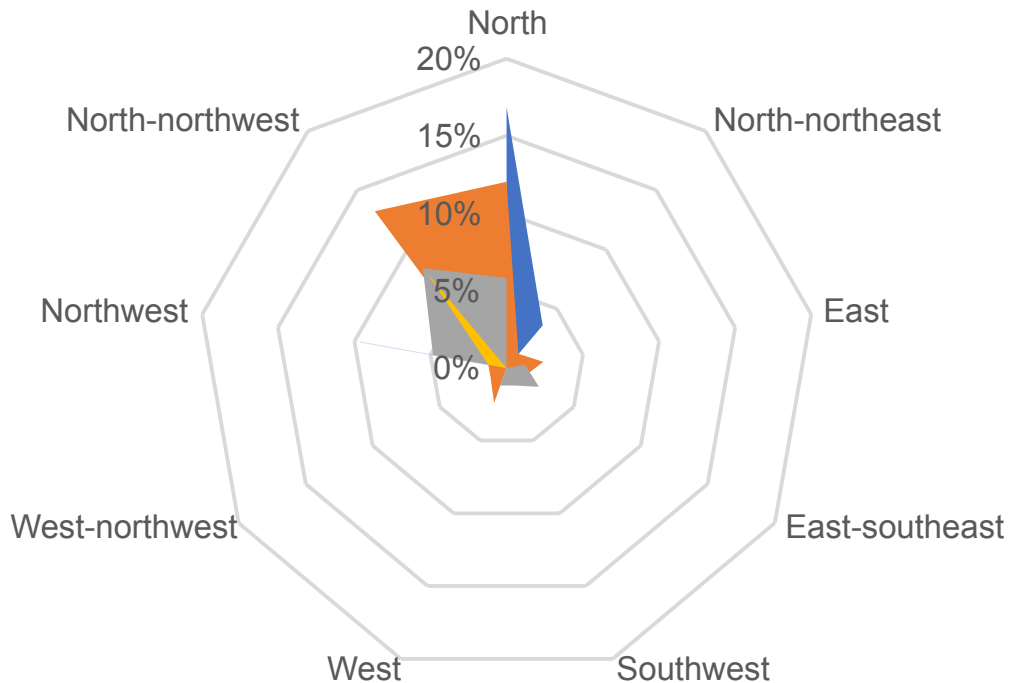

Supplement: s1 [file s1]
